# Single-molecule localization of Na<sub>v</sub>1.5 reveals different modes of reorganization at cardiomyocyte membrane domains

Sarah H. Vermij<sup>1</sup>, Jean-Sébastien Rougier<sup>1</sup>, Esperanza Agulló-Pascual<sup>2</sup>,  
Eli Rothenberg<sup>3</sup>, Mario Delmar<sup>4</sup>, and Hugues Abriel<sup>1\*</sup>

## ABSTRACT

Mutations in the gene encoding the sodium channel Na<sub>v</sub>1.5 cause various cardiac arrhythmias. This variety may arise from different determinants of Na<sub>v</sub>1.5 expression between cardiomyocyte domains. At the lateral membrane and T-tubules, Na<sub>v</sub>1.5 localization and function remain insufficiently characterized. We used novel single-molecule localization microscopy (SMLM) and modeling to define nanoscale features of Na<sub>v</sub>1.5 localization and distribution at the lateral membrane, groove, and T-tubules in wild-type, dystrophin-deficient (*mdx*) mice, and mice expressing C-terminally truncated Na<sub>v</sub>1.5 ( $\Delta$ SIV). We show that Na<sub>v</sub>1.5 organizes as distinct clusters in the groove and T-tubules which density and distribution partially depend on SIV and dystrophin. We found that overall reduction in Na<sub>v</sub>1.5 expression in *mdx* and  $\Delta$ SIV cells results in a non-uniform redistribution with Na<sub>v</sub>1.5 being specifically reduced at the groove of  $\Delta$ SIV and increased in T-tubules of *mdx* cardiomyocytes. Na<sub>v</sub>1.5 mutations may therefore site-specifically affect Na<sub>v</sub>1.5 localization and distribution depending on site-specific interacting proteins.

## AFFILIATIONS

**1**, Institute of Biochemistry and Molecular Medicine, University of Bern, Bern, Switzerland

**2**, Microscopy Core, Icahn School of Medicine at Mount Sinai, New York City, USA

**3**, Department of Biochemistry and Pharmacology, New York University School of Medicine, New York City, USA

**4**, Department of Cardiology, New York University School of Medicine, New York City, NY, USA

## \* CORRESPONDENCE

[hugues.abriel@ibmm.unibe.ch](mailto:hugues.abriel@ibmm.unibe.ch)

This article was submitted to BioRxiv.org on 18 June 2019 (BIORXIV/2019/674275)

## INTRODUCTION

Proper function of the heart heavily relies on the cardiac sodium channel Na<sub>v</sub>1.5. Na<sub>v</sub>1.5 generates the rapid upstroke of the cardiac action potential; thus, it is pivotal for cardiac excitability, conduction, and muscle contraction<sup>1,2</sup>. Mutations in its gene *SCN5A* have been associated with many cardiac arrhythmias, such as long-QT syndrome type 3, Brugada syndrome, and sick-sinus syndrome<sup>3</sup>. Mutations can cause loss or gain of function of Na<sub>v</sub>1.5, but the wide diversity in cardiac arrhythmias remains unexplained. The key may lie in the distribution of Na<sub>v</sub>1.5 over specific membrane domains – “pools” – of the cardiomyocyte. Na<sub>v</sub>1.5 pools are regulated by different proteins, so a given Na<sub>v</sub>1.5 mutation may affect a specific pool if it disturbs the interaction with a specific protein. Na<sub>v</sub>1.5 expression at the intercalated disc<sup>4</sup> and at the lateral membrane<sup>5</sup> is well established (**Figure 1**) while a third pool at the T-tubules is still disputed<sup>6</sup>. At the intercalated disc, where two cardiomyocytes are tightly coupled electrically and mechanically, Na<sub>v</sub>1.5 interacts with ankyrin-G, connexin-43, and N-cadherin, among others<sup>4</sup>. At the lateral membrane, where costameres connect the cytoskeleton to the extracellular matrix (**Figure 1a,b**), Na<sub>v</sub>1.5 interacts with the syntrophin/dystrophin complex, which is important for Na<sub>v</sub>1.5 stability, and CASK, among others<sup>7-9</sup>. The lateral membrane is shaped distinctly with valley-like grooves and hilly crests<sup>10</sup>, and Na<sub>v</sub>1.5 is expressed at both locations in murine cardiomyocytes (**Figure 1a**)<sup>11,12</sup>. T-tubules are deep invaginations of the lateral membrane that originate in the groove. They mainly provide a large surface for calcium handling, and are crucial for the uniform contraction of ventricular cardiomyocytes<sup>13</sup>. Consequently, the majority of the voltage-gated calcium channels Ca<sub>v</sub>1.2 is expressed at the T-tubules<sup>14,15</sup>. The claim of a T-tubular Na<sub>v</sub>1.5 pool has so far only been supported by inconclusive results. By comparing whole-cell *I*<sub>Na</sub> densities in detubulated and control cardiomyocytes, T-tubular sodium channels were determined to conduct 30% of total sodium current<sup>16</sup>. This is probably a considerable overestimation as this method relies on the membrane capacitance as a measure for cell membrane area, but underestimates the surface area of cardiomyocytes by about 50%<sup>17</sup>. Therefore, the presence of a T-tubular Na<sub>v</sub>1.5 pool remains undetermined.

Our current state of knowledge regarding the localization and distribution of Na<sub>v</sub>1.5 at the lateral membrane and T-tubules is based on standard microscopy methods that are limited in resolution and sensitivity. At the T-tubules, previously published immunofluorescence data on Na<sub>v</sub>1.5 show an intracellular striated pattern for Na<sub>v</sub>1.5, but without a T-tubular marker, this pattern cannot be attributed to the T-tubules<sup>18,19</sup>. The respective confocal microscopy techniques moreover lacked resolution to resolve the narrow T-tubular structure<sup>18,19</sup>. At the lateral membrane, cell-attached and scanning ion conductance microscopy (SICM) recordings of the sodium current have provided information on the number of functional channels in a given area at the lateral membrane or specifically at the crest and groove<sup>11,12,20,21</sup>, but they did not provide the molecular features needed to characterize Na<sub>v</sub>1.5 organization at these domains. Moreover, previous studies did not correlate the signal of Na<sub>v</sub>1.5 with other structural markers such as  $\alpha$ -actinin for the groove and Bin1 for the T-tubules<sup>18,19,22</sup>. As such, current models of the roles of

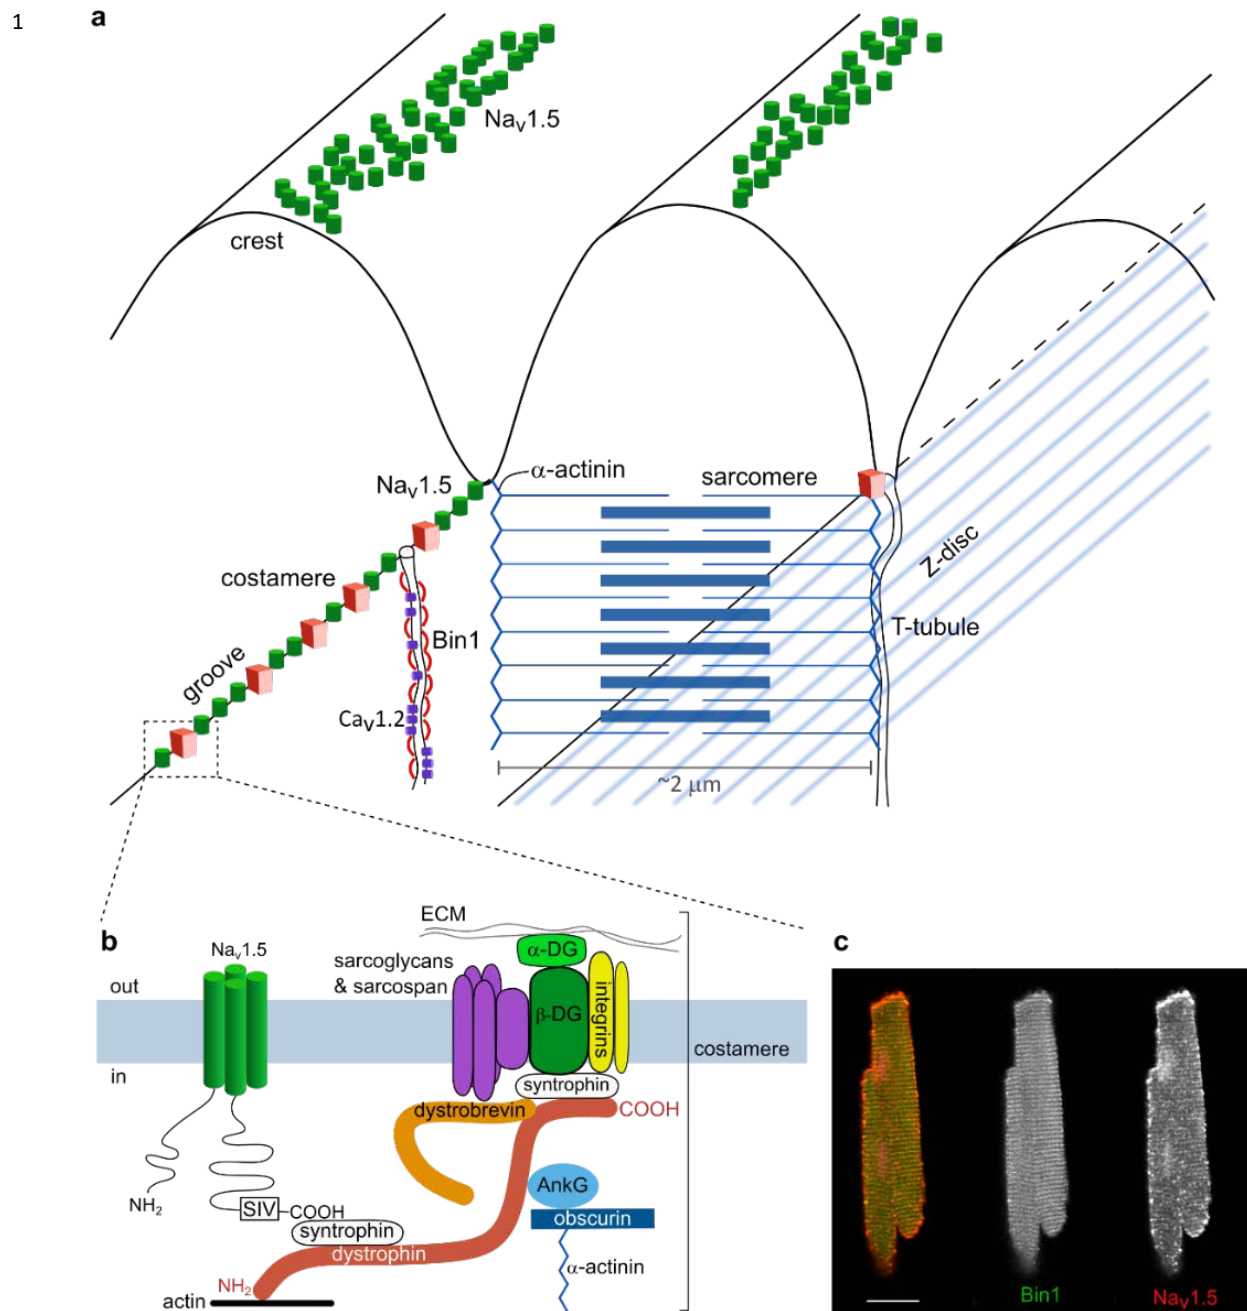

**Figure 1. Pools of Na<sub>v</sub>1.5 in cardiomyocytes.** **a**, The lateral membrane has a characteristic profile: at the groove, the membrane is anchored to the sarcomeric Z-line ( $\alpha$ -actinin; blue) through costameres (red boxes). T-tubules follow Z-lines and open to the groove. Their membrane is shaped by Bin1 (red curves) and contain, among many other proteins, voltage-gated calcium channels (Ca<sub>v</sub>1.2; purple). The crest has a dome shape. Na<sub>v</sub>1.5 is expressed at the crest and the groove. The amount of Na<sub>v</sub>1.5 in this image serves illustrative purposes only and does not reflect experimental values. **b**, At the groove, Na<sub>v</sub>1.5 (green; left) is associated with the costamere (right). The C-terminal SIV motif of Na<sub>v</sub>1.5 binds syntrophin (white), which binds dystrophin (red). Dystrophin also binds syntrophin associated with the costamere, which contains multiple transmembrane proteins, including integrins (yellow), sarcoglycans (purple), and  $\beta$ -dystroglycan (green).  $\beta$ -dystroglycan connects the sarcolemma with the extracellular matrix (ECM) via  $\alpha$ -dystroglycan. Dystrophin also links the costamere to the cytoskeleton through its association with actin at its N-terminus and with  $\alpha$ -actinin via ankyrin-G and obscurin. **c**, Confocal image of murine ventricular cardiomyocyte stained for Na<sub>v</sub>1.5 (red) and T-tubular marker Bin1 (green), showing Na<sub>v</sub>1.5 expression at the intercalated disc, lateral membrane, and an intracellular punctate pattern coinciding with Bin1 signal. Scale bar 20  $\mu$ m.

1  $\text{Na}_v1.5$  at the lateral membrane and T-tubules do not represent the true molecular nature of  $\text{Na}_v1.5$  expression  
2 and organization at these domains. To address these issues, we utilize multi-color single-molecule localization  
3 microscopy (SMLM)<sup>23</sup>, a super-resolution imaging method, providing the features of  $\text{Na}_v1.5$  organization and  
4 related markers with nanoscale resolution. Using this approach, we addressed  $\text{Na}_v1.5$  expression and cluster  
5 organization at the T-tubules using the T-tubular marker Bin1<sup>24</sup>, and  $\text{Na}_v1.5$  affinity for the groove using the  
6 groove marker  $\alpha$ -actinin in isolated cardiomyocytes. We also assessed T-tubular  $I_{\text{Na}}$  by comparing whole-cell  
7  $I_{\text{Na}}$ , rather than cluster densities, from control and detubulated cardiomyocytes. We then addressed the  
8 consequences of dystrophin deficiency (*mdx*) and  $\text{Na}_v1.5$  C-terminal truncation ( $\Delta\text{SIV}$ ) on  $\text{Na}_v1.5$  expression  
9 and organization at the lateral membrane overall, at the groove specifically, and at the T-tubules.  $\Delta\text{SIV}$  resembles  
10 the p.V2016M mutation found in a Brugada syndrome patient, replacing the C-terminal valine with a  
11 methionine, which results in an apparent reduced expression of  $\text{Na}_v1.5$ <sup>5</sup>.  $\Delta\text{SIV}$  knock-in mice display a loss of  
12 sodium current and  $\text{Na}_v1.5$  expression specifically at the lateral membrane<sup>5</sup>, and interaction of  $\text{Na}_v1.5$ - $\Delta\text{SIV}$   
13 with the syntrophin/dystrophin complex is impaired<sup>5</sup>. In accordance, dystrophin-deficient *mdx* mice display a  
14 strong reduction of sodium current and  $\text{Na}_v1.5$  expression, both overall and specifically at the lateral  
15 membrane<sup>7,8</sup>.

16 By characterizing  $\text{Na}_v1.5$  organization and expression at different pools at a nanoscale and addressing their pool-  
17 specific determinants, we come closer to understanding the pathophysiological variety in patients carrying  
18 *SCN5A* mutations, as mutations may affect  $\text{Na}_v1.5$  pools and shape the pathophysiological landscape differently.  
19 The two genetic mouse models investigated in this study give insight into pool-specific effects of a  $\text{Na}_v1.5$   
20 mutation ( $\Delta\text{SIV}$ ) and of disturbing  $\text{Na}_v1.5$  regulation (*mdx*). It appears that (1)  $\text{Na}_v1.5$  is expressed in T-tubules;  
21 (2) dystrophin deficiency increases T-tubular  $\text{Na}_v1.5$  expression; and (3)  $\text{Na}_v1.5$  expression is reduced at the  
22 lateral membrane of *mdx* and  $\Delta\text{SIV}$  mice overall whereas groove expression is specifically reduced in  $\Delta\text{SIV}$   
23 cells; (4)  $\text{Na}_v1.5$  cluster organization changes at the lateral membrane of *mdx* cells and in the T-tubules of *mdx*  
24 and  $\Delta\text{SIV}$  cells compared to wild type.

## 25 RESULTS

### 26 $\text{Na}_v1.5$ OCCURS AT DISTINCT POOLS IN MURINE VENTRICULAR CARDIOMYOCYTES

27 The main focus of this work is the characterization of  $\text{Na}_v1.5$  localization and cluster organization in different  
28 cardiomyocyte domains with novel quantitative single-molecule localization microscopy (SMLM) and  
29 modeling. Technical validation of SMLM is shown in **Supplementary Figure 1**. Firstly, however, we gained a  
30 general overview over the  $\text{Na}_v1.5$  pools with confocal microscopy. To this end, we immunostained isolated  
31 murine ventricular cardiomyocytes for  $\text{Na}_v1.5$  and the T-tubular marker Bin1.  $\text{Na}_v1.5$  is clearly expressed at the  
32 lateral membrane and intercalated disc (**Figure 1c**). Some  $\text{Na}_v1.5$  seems to co-localize with Bin1, the latter  
33 showing a striated pattern that indicates the T-tubular membrane. The limited resolution and sensitivity of the

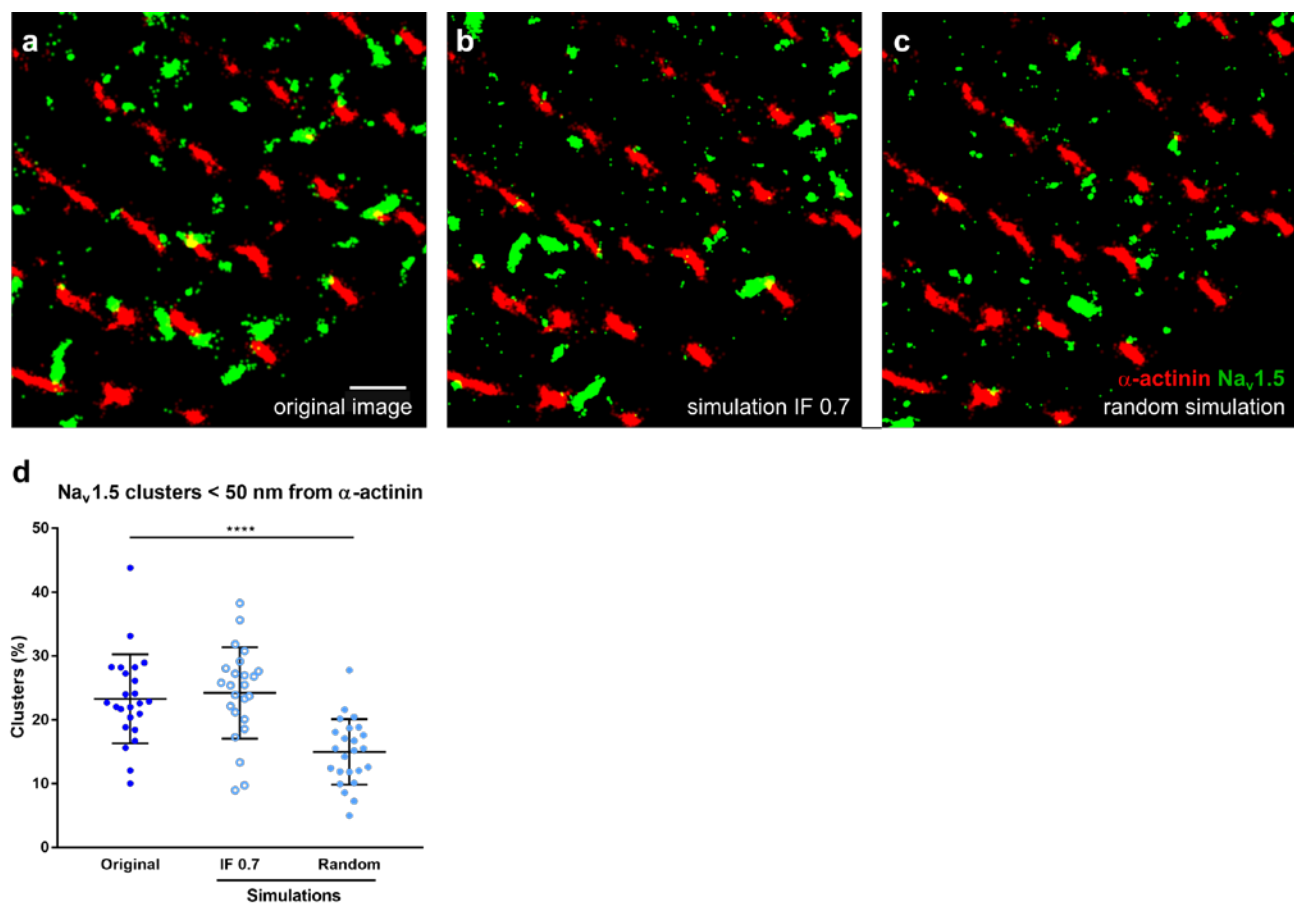

**Figure 2. Na<sub>v</sub>1.5 has affinity for the groove at the lateral membrane of a cardiomyocyte.** **a**, Super-resolution image of the lateral membrane of murine ventricular myocyte stained for Na<sub>v</sub>1.5 (green) and α-actinin (red). Na<sub>v</sub>1.5 occurs close to α-actinin, indicating the groove; and in between α-actinin lines, indicating the crest. Scale bar 1 μm. **b** and **c** display simulations of the original SMLM image (**a**), in which Na<sub>v</sub>1.5 clusters were randomly distributed (**b**) or had a high affinity for α-actinin (interaction factor [IF] 0.7 [**c**]). Note that differences in affinity are hard to spot by eye, especially in a small area of a cell. **d**, In original SMLM images of wild-type cells ( $N = 3$ ,  $n = 24$ ), the proportion of Na<sub>v</sub>1.5 within 50 nm of α-actinin is ~30% higher than in simulations in which Na<sub>v</sub>1.5 clusters of each image are distributed randomly, and similar to images in which a high affinity of Na<sub>v</sub>1.5 for α-actinin was simulated (IF 0.7). \*\*\*\*,  $p < 0.0001$ , Mann-Whitney test.

1 confocal microscope however prevents us from establishing a detailed quantitative analysis of Na<sub>v</sub>1.5 in the T-  
2 tubules (**Figure 1c**).

3 To determine the molecular characteristics of Na<sub>v</sub>1.5 expression at the lateral membrane by SMLM, we imaged  
4 the lateral membrane of wild-type cardiomyocytes stained for Na<sub>v</sub>1.5 and α-actinin, which coincides with the  
5 groove ( $N = 3$ ,  $n = 24$ ; **Figure 2a**). Indeed, Na<sub>v</sub>1.5 occurred both in close proximity to α-actinin and in between  
6 α-actinin clusters, indicating localization at the groove and the crest, respectively (**Figure 1a**, **Figure 2a**). To  
7 quantify whether the Na<sub>v</sub>1.5 clusters have an affinity for the groove, we used a novel analysis approach<sup>25</sup> based  
8 on Monte-Carlo simulations for each SMLM image ( $N = 3$ ,  $n = 24$ ) in which Na<sub>v</sub>1.5 clusters were redistributed  
9 over the image either randomly or with a high affinity for α-actinin (**Figure 2b,c**). The random simulations were  
10 performed by selecting the Na<sub>v</sub>1.5 clusters and stochastically redistributing them within the boundaries of the



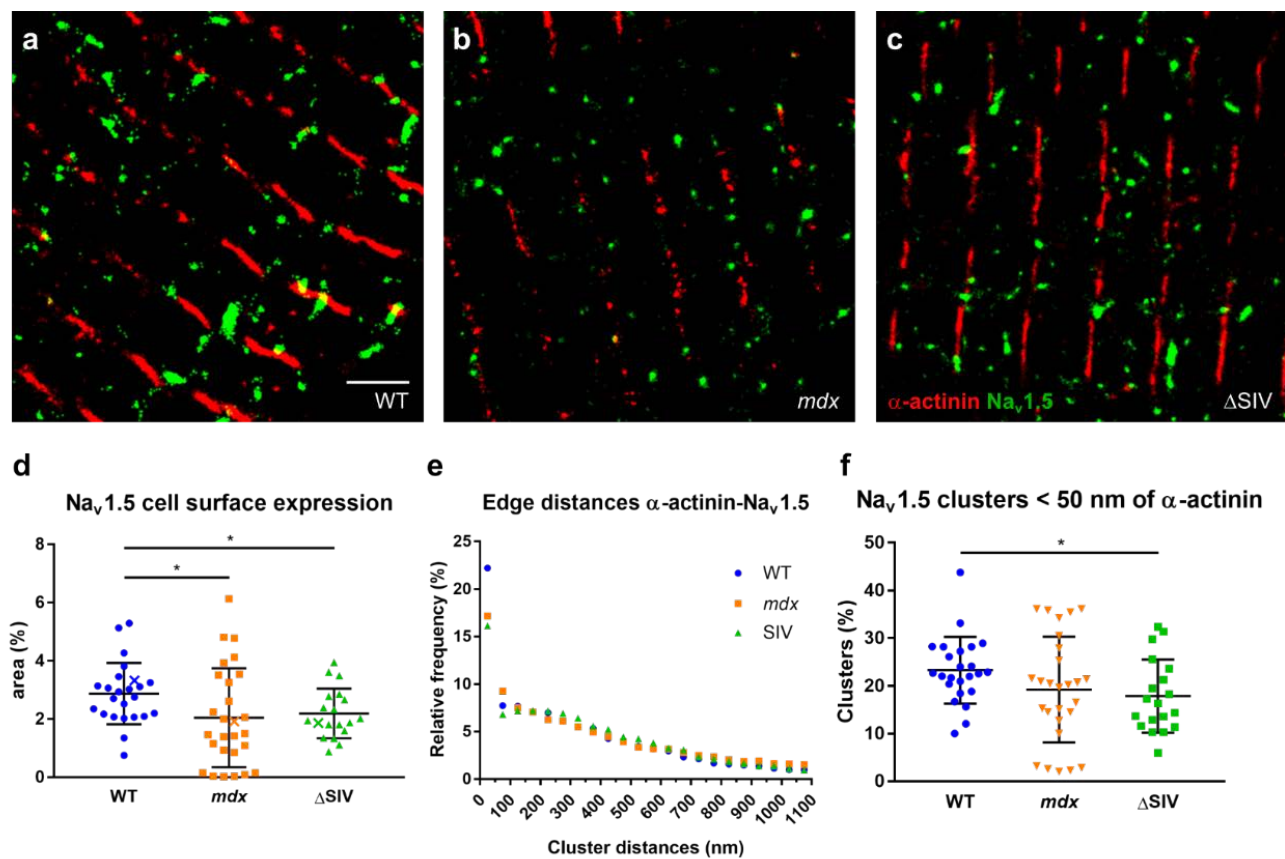

**Figure 3.  $\Delta$ SIV and *mdx* cardiomyocytes show loss of Na<sub>v</sub>1.5 expression at the lateral membrane.** a-c, Detail of SMLM images of the lateral membrane from wild-type (WT; a), *mdx* (b), and  $\Delta$ SIV (c) cells. Scale bar 1.5  $\mu$ m. d, Total Na<sub>v</sub>1.5 expression at the lateral membrane is reduced by ~30% in *mdx* and  $\Delta$ SIV compared to wild type. Data points represented by a cross (X) correspond to examples from panels a-c. e, Frequency distribution plot of edge distances from any  $\alpha$ -actinin cluster to the closest Na<sub>v</sub>1.5 cluster, bin size 50 nm. In *mdx* and  $\Delta$ SIV, a smaller proportion of Na<sub>v</sub>1.5 resides within 50 nm to  $\alpha$ -actinin compared to wild type. Frequency distributions for cluster distances larger than 50 nm are similar between the genotypes. f, Groove expression of Na<sub>v</sub>1.5, defined as Na<sub>v</sub>1.5 clusters within 50 nm of Bin1, is reduced by ~30% in  $\Delta$ SIV cardiomyocytes compared to wild type. Note that *mdx* cells display high variability in Na<sub>v</sub>1.5 cluster expression at the lateral membrane (d) and at the groove (f). Wild type  $N = 3$ ,  $n = 24$ ; *mdx*  $N = 3$ ,  $n = 27$ ;  $\Delta$ SIV  $N = 3$ ,  $n = 19$ . \*,  $p = 0.024$  (wt vs. *mdx* [d]);  $p = 0.016$  (wt vs.  $\Delta$ SIV [d]);  $p = 0.019$  (wt vs.  $\Delta$ SIV [f]), Mann-Whitney test.

user-defined region of interest (ROI). For high-affinity simulations, an interaction factor of 0.7 was assumed, given that an interaction factor of 0.0 represents random overlap between the two colors, an interaction factor of 1.0 perfect overlap, and an interaction factor equal to or more than 0.5 indicates that one color has significant affinity for the other color<sup>25</sup>. To generate high-affinity simulations with an interaction factor of 0.7, each Na<sub>v</sub>1.5 cluster was first placed randomly within the region of interest, then the program determined whether one or more pixels of the cluster overlapped with an  $\alpha$ -actinin cluster. If this overlap was detected, the cluster was kept in place; if not, the program generated a random number between 0 and 1. If that number was greater than 0.7, the cluster was kept in its position; if not, this process was repeated. Overall, these high-affinity simulations generated an image in which Na<sub>v</sub>1.5 clusters overlapped with  $\alpha$ -actinin clusters to more than a random degree.

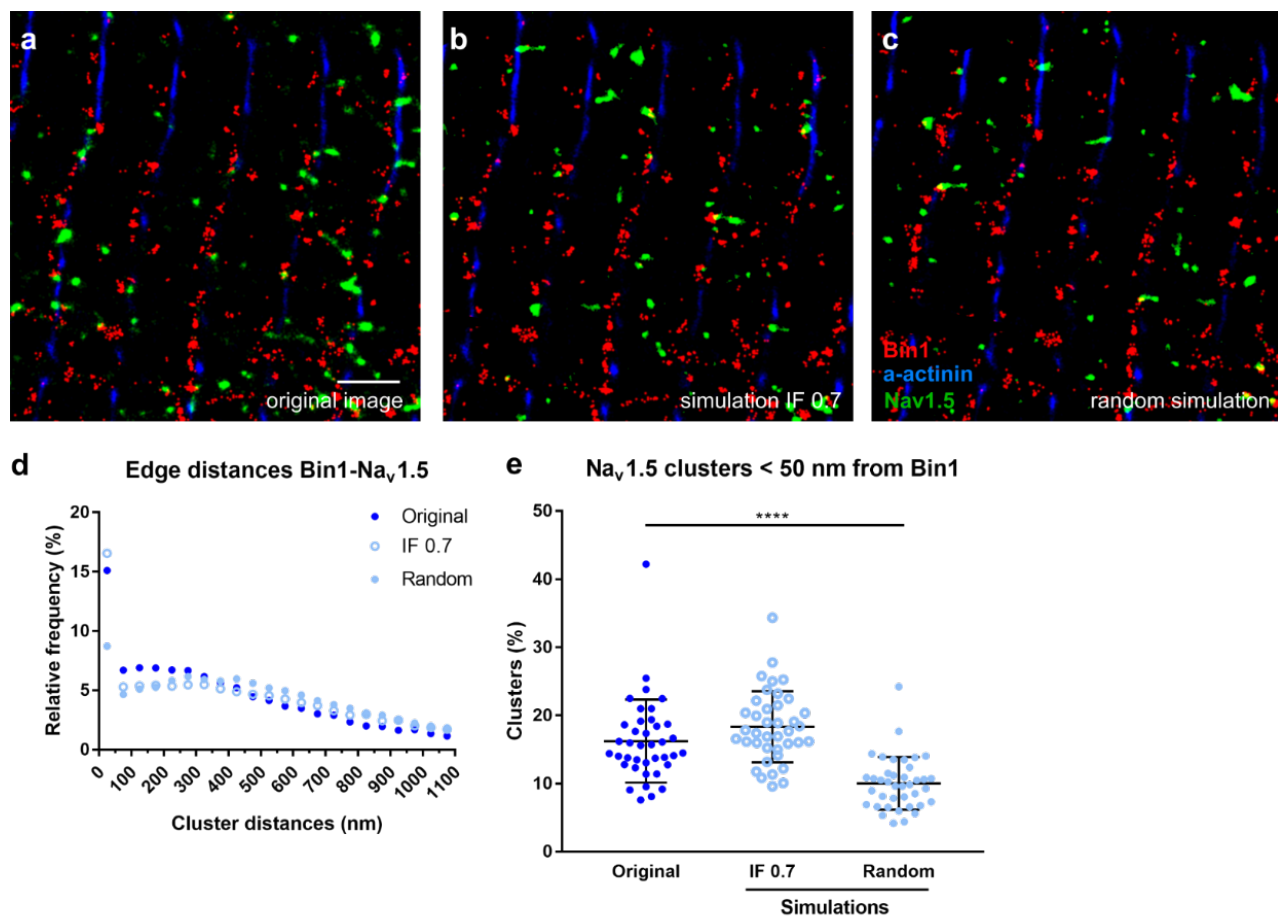

**Figure 4.  $\text{Na}_v1.5$  is expressed in the T-tubules.** **a**, Detail of an intracellular recording from a wild-type cardiomyocyte stained for  $\alpha$ -actinin (blue), Bin1 (red), and  $\text{Na}_v1.5$  (green). All  $\text{Na}_v1.5$  clusters are redistributed over the image either randomly (**b**) or with a high affinity for Bin1 (interaction factor [IF] 0.7 [**c**]). Scale bar 1.5  $\mu\text{m}$ . **d**, For each Bin1 cluster, the closest  $\text{Na}_v1.5$  cluster is within 50 nm in ~15% of cases, which is significantly more than the ~8% from random simulations and close to ~17% of the high-affinity simulations (IF 0.7) ( $N = 3$ ,  $n = 39$ ). The frequency distributions of  $\text{Na}_v1.5$  for distances to  $\alpha$ -actinin of more than 50 nm does not show any apparent difference between the genotypes. **e**, In experimental SMLM images, a higher proportion (~40%) of  $\text{Na}_v1.5$  are within 50 nm from the nearest Bin1 cluster than in random simulations, but not as much as in simulations with a high-affinity simulations (IF 0.7). Values for each individual cell/simulation are plotted. \*\*\*\*,  $p < 0.0001$ , unpaired t-test.

Then, for the original and simulated images, the distance from the edge of each  $\alpha$ -actinin cluster to the edge of the closest  $\text{Na}_v1.5$  cluster was determined.  $\text{Na}_v1.5$  was considered to be expressed in the groove if it was located within 50 nm from an  $\alpha$ -actinin cluster. We found that 25% of  $\text{Na}_v1.5$  clusters were in the groove in experimental images. This value was close to that of the simulations with high affinity for  $\alpha$ -actinin (**Figure 2d**), whereas in random simulations, only 15% of  $\text{Na}_v1.5$  clusters were within 50 nm from  $\alpha$ -actinin. These results strongly suggest that  $\text{Na}_v1.5$  has an affinity for the groove.

**$\text{Na}_v1.5$  EXPRESSION AT THE LATERAL MEMBRANE AND THE GROOVE DEPENDS ON DYSTROPHIN AND THE  $\Delta\text{SIV}$  MOTIF, WHEREAS CLUSTER ORGANIZATION DEPENDS ON DYSTROPHIN ONLY**

Our SMLM-derived metrics indicate that Na<sub>v</sub>1.5 cluster density at the lateral membrane is reduced by about 30% in *mdx* and  $\Delta$ SIV cardiomyocytes compared to wild-type cells (**Figure 3a-d**; wild type  $N = 3$ ,  $n = 24$ ; *mdx*  $N = 3$ ,  $n = 27$ ;  $\Delta$ SIV  $N = 3$ ,  $n = 19$ ). Cell size and average Na<sub>v</sub>1.5 cluster size did not change between the genotypes, although *mdx* cells showed a high variability in Na<sub>v</sub>1.5 cluster size (**Supplementary Figure 2a**). Interestingly, the solidity and circularity of Na<sub>v</sub>1.5 clusters was markedly increased in *mdx* cells compared to wild type (**Supplementary Figure 2a**). Given that solidity is defined as the ratio between the particle area and the convex hull area of the particle, and circularity as the roundness of a particle (1.0 indicating a perfect circle), the increased solidity and circularity together indicate that Na<sub>v</sub>1.5 clusters are of geometrically less complex shapes. The overall reduction of Na<sub>v</sub>1.5 expression at the lateral membrane in  $\Delta$ SIV and *mdx* cells additionally confirms the specificity of the anti-Na<sub>v</sub>1.5 antibody since these findings accord with previously reported results<sup>5,7</sup>. In addition, they show that the reduction in whole-cell  $I_{Na}$  in *mdx* cells is at least partly due to reduced Na<sub>v</sub>1.5 expression at the lateral membrane<sup>8</sup>.

To assess the effects of Na<sub>v</sub>1.5 truncation and dystrophin deficiency on Na<sub>v</sub>1.5 expression at the crest and the groove, we determined the distances from each  $\alpha$ -actinin cluster to the closest Na<sub>v</sub>1.5 cluster in *mdx* and  $\Delta$ SIV lateral-membrane images, and compared them to wild-type values. The frequency histogram (**Figure 3e**) shows that the proportion of Na<sub>v</sub>1.5 clusters within 50 nm of  $\alpha$ -actinin is reduced by ~25% in *mdx* and  $\Delta$ SIV compared to wild-type cells. When the proportion of Na<sub>v</sub>1.5 within 50 nm of  $\alpha$ -actinin is plotted for each individual cell (**Figure 3f**), only  $\Delta$ SIV cardiomyocytes show a significant ~20% reduction compared to wild type. Although mean Na<sub>v</sub>1.5 expression in *mdx* cells is reduced by about 17% compared to wild type, the data show high variability (**Figure 3f**), which correlates with the high variability in Na<sub>v</sub>1.5 expression at the lateral membrane of *mdx* cells (**Figure 3d**). The affinity of Na<sub>v</sub>1.5 for the groove is however similar in wild-type, *mdx*, and  $\Delta$ SIV cells when comparing the proportion of Na<sub>v</sub>1.5 clusters within 50 nm of  $\alpha$ -actinin from experimental images, and random and high-affinity simulations for each genotype (**Supplementary Figure 3a**).

Taken together, these results establish that (1) Na<sub>v</sub>1.5 expression at the groove of the lateral membrane partially depends on the  $\Delta$ SIV motif and dystrophin expression; (2) in dystrophin-deficient cells, Na<sub>v</sub>1.5 clusters at the lateral membrane are organized into simpler shapes compared to wild-type cells; and (3) dystrophin deficiency induces high variability in Na<sub>v</sub>1.5 expression and Na<sub>v</sub>1.5 cluster size.

## NA<sub>v</sub>1.5 IS EXPRESSED IN THE T-TUBULAR MEMBRANE

Na<sub>v</sub>1.5 expression in the T-tubules was assessed by co-staining cardiomyocytes for Na<sub>v</sub>1.5 and the T-tubular marker Bin1, and imaging an intracellular plane of each cell in highly inclined and laminated optical (HILO)



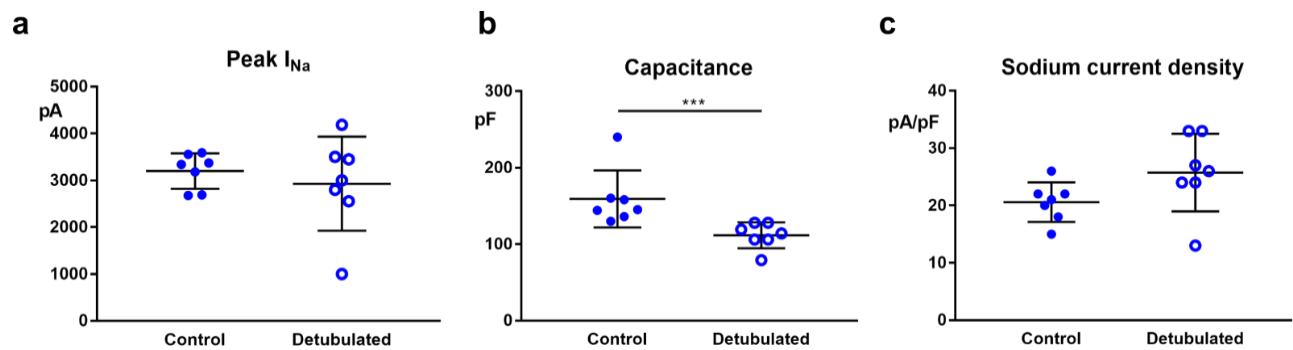

**Figure 5. Whole-cell sodium current recordings in detubulated and normal cardiomyocytes.** Compared to control cells, maximum sodium current (a) didn't change, capacitance (b) was reduced by about 30%, and sodium current density (c) increased by about 25% (non-significant) in detubulated cells.  $N = 5$ ,  $n = 7$  for both conditions. \*\*\*,  $p = 0.006$ , Mann-Whitney test.

mode with the TIRF objective. Bin1 was chosen as a T-tubular marker since it binds and shapes the T-tubular membrane and assists in the trafficking and clustering of the voltage-gated calcium channel  $Ca_v1.2$ <sup>24,26</sup>. The Bin1 antibody was first validated by confirming that Bin1 stainings are in close proximity to  $\alpha$ -actinin, given that T-tubules run in close proximity to the sarcomeric Z-disc ( $N = 3$ ,  $n = 59$ ) (Supplemental figure 4)<sup>13</sup>. Then, we assessed whether  $Na_v1.5$  and Bin1 associated randomly or not by performing simulations for each SMLM image ( $N = 3$ ,  $n = 39$ ), where  $Na_v1.5$  clusters were redistributed either randomly or with high affinity for Bin1 (Figure 4a-c).  $Na_v1.5$  clusters at the lateral membrane and intercalated disc were excluded. Then, the distance from each Bin1 cluster to the closest  $Na_v1.5$  cluster was determined. The frequency histogram shows that about 16-17% of  $Na_v1.5$  clusters is within 50 nm of Bin1 in both original images and high-affinity simulations, whereas in random simulations this value was only ~8% (Figure 4d). This was confirmed when plotting the proportion of  $Na_v1.5$  clusters within 50 nm of Bin1 for each individual image (Figure 4e). Together, these findings indicate that a considerable subset of intracellular  $Na_v1.5$  is expressed in the T-tubular membrane.

### T-TUBULAR SODIUM CURRENT CANNOT BE ASSESSED BY WHOLE-CELL RECORDINGS

Having shown that  $Na_v1.5$  is expressed at the T-tubules (Figure 4), we investigated whether we could record a T-tubular sodium current. To this end, we compared whole-cell  $I_{Na}$  recordings from normal ( $N = 5$ ,  $n = 7$ ) and detubulated ( $N = 5$ ,  $n = 7$ ) ventricular cardiomyocytes. Firstly, we concluded that detubulation was successful as the capacitance of detubulated cells was 30% lower than of control cells (Figure 5b). Whole-cell  $I_{Na}$  did not decrease after detubulation (Figure 5a), which indicates that the vast majority of sodium current is conducted by sodium channels at the intercalated disc and lateral membrane. Comparing the current density shows a 25% yet non-significant increase in  $I_{Na}$  density after detubulation (Figure 5c), further confirming that the majority of sodium channels is outside the T-tubular domain. As discussed in the introduction, current densities of

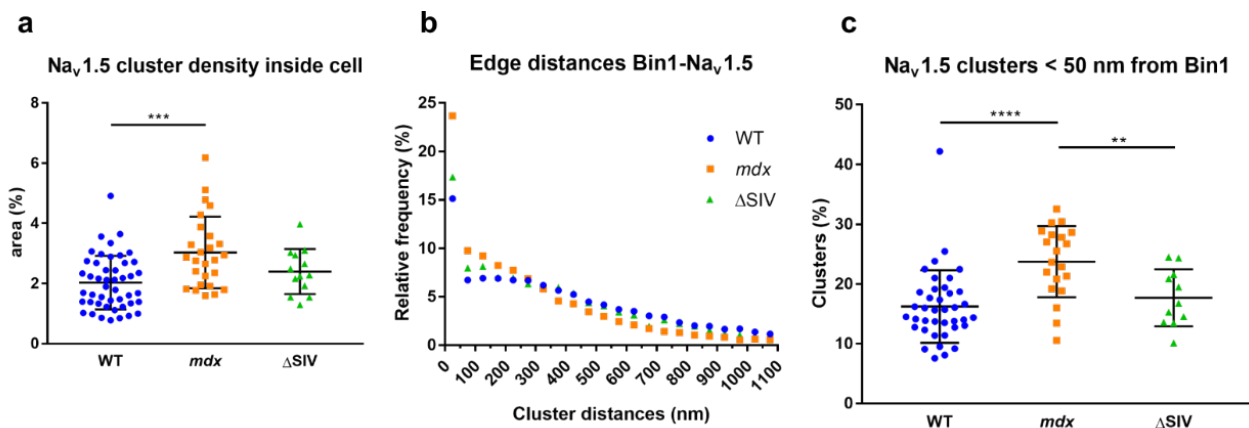

**Figure 6. Na<sub>v</sub>1.5 expression is increased in T-tubules of *mdx* mice.** **a**, Na<sub>v</sub>1.5 cluster density in intracellular membrane compartments and T-tubules is ~30% higher in *mdx* cardiomyocytes than in wild-type cardiomyocytes, but no change was observed in  $\Delta$ SIV compared to wild-type cells. **b**, For each Bin1 cluster, the distance to the closest Na<sub>v</sub>1.5 cluster is measured. Cluster distances are plotted in a frequency histogram with bins of 50 nm. The given histogram indicates that Na<sub>v</sub>1.5 preferentially locates within 50 nm to Bin1, in  $\Delta$ SIV and *mdx* more so than in wild-type cells. **c**, In *mdx* cells, a higher proportion of Na<sub>v</sub>1.5 clusters is within 50 nm from Bin1 than in wild-type cells. Together with the increase in overall intracellular Na<sub>v</sub>1.5 expression in *mdx*, this indicates that T-tubules in *mdx* cells show a higher Na<sub>v</sub>1.5 expression.  $\Delta$ SIV cells show a similar T-tubular Na<sub>v</sub>1.5 expression as WT cells. **a**, Wild type  $N = 3$ ,  $n = 47$ ; *mdx*  $N = 3$ ,  $n = 26$ ;  $\Delta$ SIV  $N = 3$ ,  $n = 13$ . **b,c** Wild type  $N = 3$ ,  $n = 39$ ; *mdx*  $N = 3$ ,  $n = 20$ ;  $\Delta$ SIV  $N = 3$ ,  $n = 11$ . \*\*,  $p = 0.0095$ ; \*\*\*,  $p = 0.0002$ ; \*\*\*\*,  $p < 0.0001$ , Mann Whitney test.

detubulated and control cardiomyocytes cannot be compared directly as capacitance measurements in control cardiomyocytes result in a considerable underestimation of cell membrane area. Thus, our data show that the T-tubular  $I_{Na}$  is below the detection limit of the whole-cell patch-clamp technique.

#### NA<sub>v</sub>1.5 EXPRESSION IS INCREASED IN T-TUBULES FROM DYSTROPHIN-DEFICIENT CARDIOMYOCYTES, AND CLUSTER ORGANIZATION DEPENDS ON THE SIV MOTIF AND DYSTROPHIN

We next investigated whether dystrophin deficiency (*mdx*) and deletion of the SIV motif of Na<sub>v</sub>1.5 affected Na<sub>v</sub>1.5 expression in the T-tubules. Firstly, we determined that overall Na<sub>v</sub>1.5 cluster density in intracellular planes was increased in *mdx* compared to wild-type cells, whereas no difference was observed between  $\Delta$ SIV and wild-type cells (Figure 6a; wild type  $N = 3$ ,  $n = 47$ ; *mdx*  $N = 3$ ,  $n = 26$ ;  $\Delta$ SIV  $N = 3$ ,  $n = 13$ ). We also noted an increase in cluster solidity in *mdx* and an increase in cluster circularity in *mdx* and  $\Delta$ SIV compared to wild-type cells, while cell size and average Na<sub>v</sub>1.5 cluster size did not differ between the three genotypes. Similar to what we observed at the lateral membrane, this indicates that intracellular Na<sub>v</sub>1.5 clusters have geometrically simpler shapes in *mdx* and  $\Delta$ SIV cells.

The frequency histogram plotting distances between Bin1 and Na<sub>v</sub>1.5 shows that the proportion of Na<sub>v</sub>1.5 within 50 nm to Bin1 was ~30% higher in *mdx* and ~4% higher in  $\Delta$ SIV compared to wild type (Figure 6b; wild type  $N = 3$ ,  $n = 39$ ; *mdx*  $N = 3$ ,  $n = 20$ ;  $\Delta$ SIV  $N = 3$ ,  $n = 11$ ). Plotting these values from individual cells confirmed this increase of T-tubular Na<sub>v</sub>1.5 in *mdx* cells, but no difference between  $\Delta$ SIV and wild type cells was observed

(**Figure 6c**). When comparing T-tubular  $\text{Na}_v1.5$  expression from original images and random and high-affinity simulations,  $\text{Na}_v1.5$  displays an affinity for Bin1 in all three genotypes; but in *mdx* cells,  $\text{Na}_v1.5$  has an even higher affinity for Bin1 than in the high-affinity simulations (**Supplementary figure 3b**).

Taken together, these data indicate that dystrophin deficiency induces a higher  $\text{Na}_v1.5$  expression associated with intracellular membrane compartments and T-tubules compared to wild type, whereas this effect was not observed in  $\Delta\text{SIV}$  cells. Intracellular  $\text{Na}_v1.5$  cluster shape were also markedly simpler in  $\Delta\text{SIV}$  and *mdx* compared to wild-type cardiomyocytes.

## DISCUSSION

This work aimed to surpass the previously published limited-resolution characterization of  $\text{Na}_v1.5$  expression and cluster organization at the lateral membrane and T-tubules of cardiomyocytes. To this end, we applied novel quantitative single-molecule localization microscopy (SMLM) and modeling techniques to investigate  $\text{Na}_v1.5$  organization at the crest, groove, and T-tubules in cardiomyocytes from wild-type mice, dystrophin-deficient (*mdx*) mice, and mice expressing C-terminally truncated  $\text{Na}_v1.5$  ( $\Delta\text{SIV}$ ). We showed that (1)  $\text{Na}_v1.5$  expression in the groove of the lateral membrane partly depends on dystrophin and the SIV motif of  $\text{Na}_v1.5$ ; (2) dystrophin is involved in  $\text{Na}_v1.5$  cluster organization at the lateral membrane; (3)  $\text{Na}_v1.5$  is expressed in the T-tubules, although we could not assess T-tubular sodium current with our electrophysiological approach; (4) T-tubular  $\text{Na}_v1.5$  expression is increased in dystrophin-deficient but not in  $\Delta\text{SIV}$  cardiomyocytes; and (5) intracellular  $\text{Na}_v1.5$  cluster organization depends on dystrophin and the SIV motif. These findings are schematically summarized in **Figure 7**.

We convincingly showed that  $\text{Na}_v1.5$  is expressed in the T-tubules by co-staining  $\text{Na}_v1.5$  with the T-tubular marker Bin1 in SMLM recordings, and assessing the robustness of this association by novel *in silico* methods<sup>25,27</sup>. By comparing original images to simulations of these images in which  $\text{Na}_v1.5$  clusters were redistributed either randomly or with high affinity for Bin1, the T-tubular population of  $\text{Na}_v1.5$  in original images is twice as high as in random populations and comparable to that from high-affinity simulations (**Figure 4e**). The function of  $\text{Na}_v1.5$  at the T-tubules remains elusive, although  $\text{Na}_v1.5$  in the T-tubules will theoretically increase conduction velocity<sup>28</sup>. Since some Bin1 and  $\text{Na}_v1.5$  clusters overlapped (**Figure 4a**), we may hypothesize that Bin1 could be involved in the regulation of  $\text{Na}_v1.5$  as Bin1 also regulates the trafficking of voltage-gated calcium channel  $\text{Ca}_v1.2$ <sup>29</sup>.

We showed that the presence of a T-tubular  $I_{\text{Na}}$  could not be deducted from whole-cell electrophysiological methods: whole-cell currents between detubulated and control cardiomyocytes were similar (**Figure 5a**). The

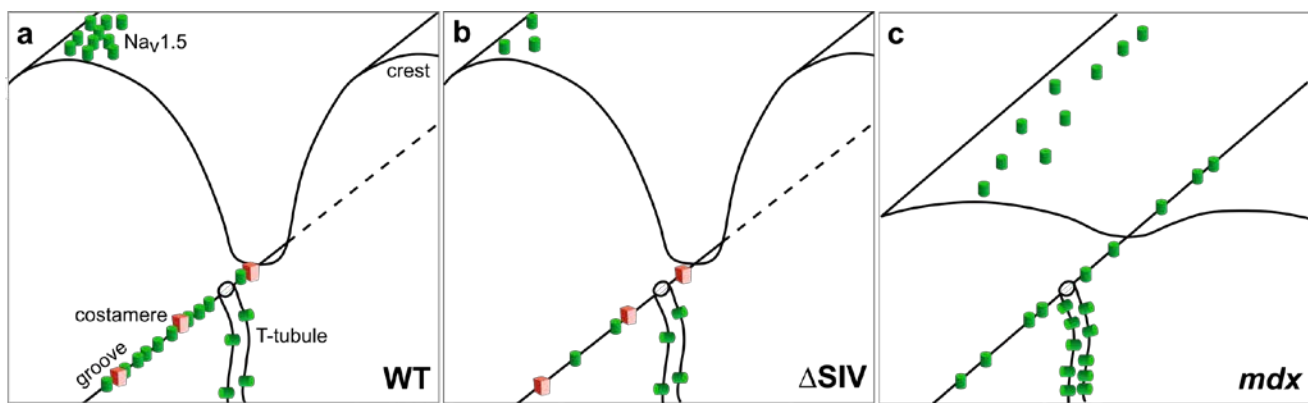

**Figure 7. Model depicting changes at the lateral membrane of  $\Delta\text{SIV}$  and *mdx* cardiomyocytes.** Compared to the wild-type condition (a),  $\Delta\text{SIV}$  cells (b) show less  $\text{Na}_v1.5$  at the lateral membrane overall and specifically in the groove, whereas the lateral membrane structure remain intact. In *mdx* cells (c), the lateral membrane is flatter than in wild-type and  $\Delta\text{SIV}$  cells, and  $\text{Na}_v1.5$  expression at the lateral membrane is reduced overall; yet the expression at groove of *mdx* cells is not as affected as that of  $\Delta\text{SIV}$  cells. Costameres are severely compromised in *mdx* cells. In the T-tubules,  $\text{Na}_v1.5$  is similarly expressed in wild-type (a) and  $\Delta\text{SIV}$  cells (b), and expression is elevated in *mdx* cardiomyocytes (c).

T-tubular  $I_{\text{Na}}$  may not surpass the noise of whole-cell recordings, or the T-tubular membrane may not be properly voltage clamped in our whole-cell approach, thus a proportion of T-tubular sodium channels may not be activated (space clamp issue). In the past, the T-tubular  $I_{\text{Na}}$  was suggested to be ~30% of total  $I_{\text{Na}}$  by comparing current densities from detubulated and control cells<sup>16</sup>. Measuring the capacitance in control cells underestimates cell membrane area, however, which disqualifies the direct comparison of current densities non-detubulated to detubulated cells<sup>17</sup>. Other electrophysiological methods have not been able to record T-tubular currents either: cell-attached<sup>20</sup> and SICM data<sup>11,30</sup> only show currents from a few voltage-gated calcium channels whereas a much stronger calcium current would be expected from the T-tubules. To assess the T-tubular  $I_{\text{Na}}$ , more specific methods need to be developed.

When dystrophin is absent, less  $\text{Na}_v1.5$  is expressed at the lateral membrane (Figure 3a), but more  $\text{Na}_v1.5$  is expressed in the T-tubules compared to wild-type cells (Figure 6c). The reduction  $\text{Na}_v1.5$  at the lateral membrane of *mdx* cells may be explained by the loss of costamere integrity (Figure 7)<sup>31</sup>. We may also hypothesize that dystrophin deficiency causes a partial rerouting of  $\text{Na}_v1.5$  trafficking to the T-tubules instead of to the lateral membrane by an unknown mechanism. The short dystrophin product Dp71 may be involved since it is present only at the T-tubules<sup>32</sup>, and binds ion channels and the cytoskeleton<sup>33</sup>. In light of the overall reduction of  $\text{Na}_v1.5$  protein expression and  $I_{\text{Na}}$  in *mdx* hearts<sup>8</sup>, the relative increase of T-tubular  $\text{Na}_v1.5$  expression may make matters worse: due to the restricted space in the T-tubular lumen, the T-tubular sodium current may partially self-attenuate<sup>6,34</sup>. A *de facto* translocation of  $\text{Na}_v1.5$  from the lateral membrane to the T-tubules of *mdx* cells may quench whole-cell sodium current and contribute to the reduction in ventricular conduction velocity observed in *mdx* mice<sup>6,8</sup>. Whether this effect indeed takes place *in vivo* requires further research.

Interestingly, Na<sub>v</sub>1.5 cluster shapes in the groove and the intracellular compartment are simpler in *mdx* than in wild-type cells, illustrated by the increased solidity and circularity (**Supplementary Figure 2**). This indicates that dystrophin is involved in scaffolding and shaping the Na<sub>v</sub>1.5 clusters, which may be related to the large size (427 kD) of dystrophin, and to the link to the actin cytoskeleton dystrophin provides<sup>35</sup>. On the other hand, Na<sub>v</sub>1.5 clusters in  $\Delta$ SIV cells show an increase in solidity only in intracellular planes (**Supplementary Figure 2b**). This suggests that the interaction of Na<sub>v</sub>1.5 with the syntrophin-dystrophin plays a role in cluster organization in the intracellular compartment/T-tubules, while at the lateral membrane, the secondary N-terminal syntrophin-binding site of Na<sub>v</sub>1.5 may support interaction with dystrophin and wild-type-like Na<sub>v</sub>1.5 cluster organization<sup>36</sup>.

The residual Na<sub>v</sub>1.5 expression at the lateral membrane of *mdx* mice may be explained by the dystrophin homologue utrophin<sup>37</sup>. Utrophin is expressed during the fetal phase, and re-expressed in adult tissue when dystrophin is absent in mice, but not in humans<sup>37,38</sup>. Since we found that Na<sub>v</sub>1.5 cluster density and size at the lateral membrane and at the groove is highly variable in *mdx* cells (**Figure 3a,c, Supplementary Figure 2a**), ventricular cardiomyocytes may display a high variability in compensatory utrophin and Dp71 expression. Utrophin however does not rescue a wild-type-like phenotype: the costameres and sarcolemma of utrophin-expressing *mdx* mice are still weak<sup>39</sup>, and the crest-groove profile at the lateral membrane of *mdx* cardiomyocytes is flattened compared to wild type (**Figure 7c**)<sup>40</sup>. The effects of dystrophin deficiency when the aforementioned compensatory mechanisms are not available will need to be assessed in samples from the hearts of Duchenne patients and of dystrophin/utrophin/Dp71 triple knock-out mice.

Like *mdx* mice,  $\Delta$ SIV mice express less Na<sub>v</sub>1.5 at the lateral membrane, and the groove pool is specifically affected (**Figure 3d,f**). The  $\Delta$ SIV truncation reduces the interaction of Na<sub>v</sub>1.5 with the syntrophin-dystrophin complex<sup>5</sup>. Since  $\Delta$ SIV mice still express dystrophin, costameres presumably remain intact. Of note, the syntrophin-dystrophin complex may also interact with the N-terminus of Na<sub>v</sub>1.5<sup>36</sup>, possibly explaining the reduction, rather than the abolition, of Na<sub>v</sub>1.5 localization to the groove and the lateral membrane. Contrary to *mdx* mice, we did not observe an increase of Na<sub>v</sub>1.5 at the T-tubules in  $\Delta$ SIV mice, which may be explained by their intact costameres.

A groove-specific reduction of Na<sub>v</sub>1.5, as shown for  $\Delta$ SIV and a subset of *mdx* cardiomyocytes, and an increase in T-tubular Na<sub>v</sub>1.5, as shown for *mdx* cells, may affect conduction and excitability in different ways. However, late openings between the crest and the groove as well as biophysical properties did not differ in murine cardiomyocytes<sup>11</sup>. Future studies should address specific differences in function and regulation of Na<sub>v</sub>1.5 in the crest, groove, and T-tubules.

Intriguingly, while our data revealed that Na<sub>v</sub>1.5 is reduced at the groove of *mdx* and  $\Delta$ SIV mice, Rivaud *et al.* have recently shown in a murine heart failure model (transient aortic constriction) that sodium current is specifically reduced at the crest, not at the groove, compared to sham-operated animals<sup>11</sup>. Rivaud *et al.* showed



that Na<sub>v</sub>1.5 cluster size, not cluster density, was markedly reduced at the lateral membrane in the heart failure model, whereas our data show that cluster density, not cluster size, was reduced in *mdx* and  $\Delta$ SIV cells (**Supplementary Figure 2a**). Expression and organization of Na<sub>v</sub>1.5 at the crest and the groove was however not investigated in this heart failure model. Together, these data suggest that cardiomyocytes respond differently to dystrophin deficiency, Na<sub>v</sub>1.5 truncation ( $\Delta$ SIV), and transient aortic constriction<sup>11</sup>. One obvious difference is the hypertrophy observed in the heart failure model but not in *mdx* or  $\Delta$ SIV mice. These different pathways remain to be elucidated in detail.

The phenotype of Brugada syndrome patients carrying the mutation p.V2016M, which changes the C-terminal motif SIV into SIM, may be partly explained by a reduction in Na<sub>v</sub>1.5 cluster density in the groove of the lateral membrane and a reduction of dystrophin-Na<sub>v</sub>1.5 interaction<sup>8</sup>. Indeed, in  $\Delta$ SIV cardiomyocytes, transversal conduction velocity, total sodium current, and sodium current at the lateral membrane are decreased<sup>5</sup>, which may contribute to the Brugada syndrome phenotype. However, the specific role of groove-specific Na<sub>v</sub>1.5 reduction remains to be determined.

A limitation of our study is that *mdx* mice display various compensatory mechanisms discussed above that do not allow us to assess the effect of a “pure” dystrophin deficiency. *Mdx* mice moreover do not have the optimal controls, since they were on a Bl6/Ros background while being backcrossed to Bl/6J in the fourth generation, whereas wild-type and  $\Delta$ SIV mice were littermates on a pure Bl6/J background. The discrepancy in backgrounds may have introduced variability in our data, although the data are consistent with previously published results<sup>7,8</sup>. Lastly, our methods did not allow us to quantify crest expression of Na<sub>v</sub>1.5.

Taken together, our findings provide important and previously unattainable mechanistic insights on the properties of Na<sub>v</sub>1.5 organization on the crest, groove, and lateral membrane of cardiomyocytes, and are an important step towards identifying cardiac domain-specific molecular determinants of Na<sub>v</sub>1.5 and location-specific effects of *SCN5A* mutations. However, pool-specific function and regulation of Na<sub>v</sub>1.5 at the crest, groove, and T-tubules remains to be studied in more detail.

## METHODS

### ETHICAL STATEMENT

All animal experiments conformed to the *Guide to the Care and Use of Laboratory Animals* (US National Institutes of Health, publication No. 85-23, revised 1996); were approved by the Cantonal Veterinary Administration, Bern, Switzerland; conformed to the New York University guidelines for animal use and care (IACUC Protocol 160726-03 to MD, approved 07/11/2018); and have complied with the Swiss Federal Animal Protection Law.

### MOUSE MODELS

## 1 **Dystrophin knock-out (*mdx*<sup>5cv</sup>) mice**

2 The *mdx*<sup>5cv</sup> mouse strain displays total deletion of dystrophin protein. It was generated as described previously<sup>41</sup>, and  
3 purchased from the Jackson laboratory (Bar Harbor, Maine; stock #002379). *Mdx* mice were on a mixed background of  
4 Bl6/Ros and Bl6/J (fourth generation of backcrossing). Male littermates aged 16 weeks were used.

## 5 **ΔSIV knock-in mice**

6 In ΔSIV knock-in mice, the C-terminal SIV motif of Na<sub>v</sub>1.5 is deleted (*Scn5a*-p.S2017STOP), as described previously<sup>5</sup>.  
7 ΔSIV mice and wild-type littermates are on a pure Bl6/J background. All mice (male and female) were 16 weeks old.

## 8 **ISOLATION OF MURINE VENTRICULAR MYOCYTES**

9 All experimental steps are performed at room temperature unless specified otherwise.

10 Cardiomyocytes were isolated based on a previously established enzymatic method<sup>8</sup>. Briefly, mice were euthanized by  
11 cervical dislocation. Hearts was excised, cannulated, and mounted on a Langendorff system for retrograde perfusion at  
12 37°C. Hearts were rinsed first with nominally Ca<sup>2+</sup>-free solution containing (in mM) 135 NaCl, 4 KCl, 1.2 MgCl<sub>2</sub>, 1.2  
13 NaH<sub>2</sub>PO<sub>4</sub>, 10 HEPES, and 11 glucose (pH 7.4, NaOH adjusted), then with digestion solution for 15 minutes, consisting of  
14 the aforementioned solution supplemented with 50 μM Ca<sup>2+</sup> and collagenase type II (1 mg/mL; Worthington, Allschwil,  
15 Switzerland). Subsequently, atria were removed. Ventricles were transferred to nominally Ca<sup>2+</sup>-free solution and minced  
16 into small pieces. To increase the yield of isolated cells, digested ventricular tissue was triturated gently and filtered through  
17 a 100 μm nylon mesh. Before use, cells were subjected to a calcium increase procedure.

## 18 **CONFOCAL MICROSCOPY**

19 Isolated cardiomyocytes were fixed with acetone at -20°C for 10 minutes in cell culture chambers. Cells were washed twice  
20 with phosphate-buffered saline (PBS), permeabilized with 0.1% saponin in PBS for 2 x 7 minutes, and blocked for 15  
21 minutes with PBS containing 10% normal goat serum, 1% bovine serum albumin (BSA), 0.1% saponin, and 30 μg/mL Fab  
22 fragment donkey anti-mouse IgG (H+L) (Jackson Immuno Research, Baltimore, Maryland). All following antibody  
23 dilutions and washing steps were performed with incubation buffer (3% normal goat serum, 0.05% saponin, and 1% BSA  
24 in PBS) unless specified otherwise. Primary antibodies were diluted and applied onto cells for overnight incubation at 4°C.  
25 Afterwards, cells were washed 4 times for 5 minutes, and incubated with secondary antibodies for 2 hours. Cells were  
26 washed 3 times for 5 minutes, incubated with DAPI (1 μL in 200 μL PBS) for 20 minutes, washed twice with PBS, and  
27 finally embedded in FluorSave reagent (Merck, Burlington, Massachusetts). Cells were imaged on a confocal microscope  
28 (LSM710, Zeiss, Oberkochen, Germany).

## 29 **SINGLE-MOLECULE LOCALIZATION MICROSCOPY**

### 30 **Sample preparation**

31 Freshly isolated cardiomyocytes were plated on laminin-coated glass coverslips and allowed to adhere at 37°C for 30  
32 minutes. Cells were fixed with 4% paraformaldehyde for 10 minutes and washed 3 times with PBS. To quench

autofluorescence, cells were placed overnight under 470 nm LED light. Then, cells were permeabilized with 0.1% Triton X-100 in PBS for 10 minutes, and blocked with blocking solution (2% glycine, 2% BSA, and 0.2% gelatin in PBS) for 30 minutes. All following antibody dilutions and washes were performed with blocking solution unless specified otherwise. Unconjugated primary antibodies were applied to the cells for 1 hour, followed by three 5-minute washes. Secondary antibodies were applied for 15 minutes, followed by three 5-minute washes and an optional 15-minute incubation with conjugated primary antibodies. Lastly, cells were washed with PBS for 5 minutes. Coverslips were mounted onto microscope slides in which two small holes were drilled and using double-sided tape as spacers, creating a fluid chamber. Chambers were sealed with epoxy resin.

## Optical setup and image acquisition

SMLM imaging was performed in accordance to a previously described method<sup>23</sup>. To achieve stochastic fluorophore blinking, imaging buffer was added to the cells, containing 200 mM 2-mercaptoethylamine, 10% glucose, 0.04 mg/mL glucose oxidase and 0.08 mg/mL catalase in T50 buffer (10 mM Tris pH 8 and 50 mM NaCl in MilliQ). Samples were imaged on a customized Leica DMI 300 inverse microscope equipped with an HCX PL APO 63X NA = 1.47 OIL CORR TIRF objective (Zeiss), a 2X tube lens (Diagnostic Instruments, Sterling Heights, Michigan) and a chromatic aberration correction lens (AC254-300-A; Thorlabs, Newton, New Jersey). Samples were sequentially excited by a 639 nm laser (MRL-FN-639-800; UltraLasers, Newmarket, Canada), 561 nm laser (MGL-FN-561-200; UltraLasers), and 488 nm laser (OBIS; Coherent, Santa Clara, California). A 405 nm laser (MDL-III-405-150; CNI, Changchun, China) was used to reactivate AlexaFluor 647 fluorophores. Lasers were aligned by a penta-edged dichroic beam splitter (FF408/504/581/667/762-Di01-22x29). The 488, 561, and 639 laser lines were adjusted to ~0.8, 1.0, and 1.5 kW/cm<sup>2</sup>, respectively. The emitted fluorescence was filtered by the applicable single-band fluorescence filter (FF01-531/40, FF01-607/36, and FF01-676/37 for AlexaFluor 488, 568, and 647, respectively; Semrock, Rochester, New York) in a filter wheel, and recorded at 33 Hz by a sCMOS camera (Prime95B; Photometrics, Tucson, Arizona) with a minimum of 2000 frames per wavelength. Recordings were controlled by MicroManager software (version 1.4.22; [www.micro-manager.com](http://www.micro-manager.com)). The readout noise of each camera pixel was pre-calibrated and characterized by a Gaussian distribution<sup>42</sup>.

## Alignment of different colors for SMLM images

Different colors were aligned following previously described methods<sup>23</sup>. Briefly, broad-spectrum fluorescent beads (diameter ~100 nm, TetraSpec; Thermo Fisher, Waltham, Massachusetts) were imaged sequentially in the blue (488 nm), green (568 nm), and red (639 nm) channels. The images from the blue and green channels were aligned to the red channel using a second polynomial warping algorithm in Matlab (version R2017b; Mathworks, Natick, Massachusetts).

## Single-molecule localization

Single-molecule localization also followed a previously described method<sup>23</sup>. In short, from each image stack, each frame was box-filtered. Box size was four times the full width at half maximum of a 2D Gaussian point spread function (PSF). Each pixel was weighted by the inverse of its variation during such box-filtering. The low-pass filtered image was extracted from the raw image, and local maxima were identified. Local maxima from all frames of one image stack were subjected to 2D Gaussian multi-PSF fitting<sup>43</sup>. The 2D Gaussian single-PSF fitting was performed using the maximum likelihood estimation (MLE) algorithm on a GPU (GTX 1060, CUDA 8.0; Nvidia, Santa Clara, California). The likelihood function

at each pixel was based on convolving the Poisson distribution of the shot noise, which is governed by the photons emitted from nearby fluorophores, and the Gaussian distribution of the readout noise characterized by the pre-calibrated expectation, variation, and analog-to-digital conversion factor. Fitting accuracy was estimated by Cramér-Rao lower bound.

## Image analysis

Images were processed based on previously described methods<sup>27</sup>. Briefly, images were subjected to a smoothing filter, adjusted for brightness and contrast, and filtered to a threshold to obtain a binary image with ImageJ software (version 1.51j8; <https://imagej.net>). Regions of interest were drawn, defined as regions with regular  $\alpha$ -actinin and/or Bin1 staining, depending on the applied antibodies. We excluded the intercalated disc regions from both surface and intracellular recordings, and the lateral membrane regions from intracellular recordings. Clusters were analyzed in ImageJ. Image simulations were performed using the Interaction Factor plugin in ImageJ<sup>25</sup>, and distance between clusters in experimental and simulated images were obtained using the ImageJ function ‘Analyze particles’ and a script written in Python (version 2.7; [www.python.org](http://www.python.org)) that utilized the image processing packages ‘scikit-image’ and ‘mahotas’<sup>27</sup>. Frequency histograms of cluster distances were made in GraphPad Prism (version 7; GraphPad Software, San Diego, CA, USA). The investigator that analyzed the images was ignorant of the corresponding genotypes.

## ANTIBODIES

Primary antibodies were: custom-made rabbit anti-Na<sub>v</sub>1.5 (epitope: amino acids 493-511 of rat Na<sub>v</sub>1.5; Pineda Antibody Service, Berlin, Germany; 1:100), mouse anti-Bin1 (amphiphysin-II; epitope: amino acids 179-207 of human Bin1; Santa Cruz Biotechnology, Dallas, Texas; 1:50), mouse anti- $\alpha$ -actinin (raised against rabbit skeletal  $\alpha$ -actinin; Sigma-Aldrich, St. Louis, Missouri; 1:400), and the same anti- $\alpha$ -actinin antibody directly conjugated to AlexaFluor 488 or 647 (Thermo Fisher; 1:2000 or 1:5000, respectively). Secondary antibodies were: rabbit AlexaFluor 568 (Life Technologies, Carlsbad, California; SMLM: 1:10,000; confocal: 1:200), mouse AlexaFluor 647 (Life Technologies; SMLM: 1:5000), and mouse AlexaFluor 488 (Life Technologies; confocal: 1:200).

## DETUBULATION

Isolated cardiomyocytes were detubulated by osmotic shock using formamide based on a previously described method<sup>44</sup>. Briefly, cardiomyocytes were resuspended in 2 mL 1.5 M formamide solution for 15 minutes and washed twice with extracellular solution (see “Electrophysiology” section).

## ELECTROPHYSIOLOGY

Whole-cell sodium currents ( $I_{Na}$ ) were recorded at 22-23°C using a VE-2 amplifier (Alembic Instruments Inc., Montréal, Canada). Borosilicate glass pipettes were pulled to a series resistance of ~2 M $\Omega$ . Recordings were visualized with pClamp software (version 8, Axon Instruments, Union City, California), and analyzed with pClamp and OriginPro (version 7.5, OriginLab Corp., Northampton, Massachusetts). Current densities (pA/pF) were calculated by dividing the peak current by the cell capacitance. Cells were bathed in extracellular solution containing (in mM) 5 NaCl, 125 NMDG-Cl, 5.6 CsCl, 5 BaCl<sub>2</sub>, 1 MgCl<sub>2</sub>, 10 HEPES, and 5 glucose (pH 7.4, CsOH adjusted). Internal solution contained (in mM) 130 KCl, 4 Mg-ATP, 12 NaCl, 1 MgCl<sub>2</sub>, 1 CaCl<sub>2</sub>, 10 EGTA, 10 HEPES (pH 7.2, KOH adjusted).

## STATISTICS

Data are presented as means  $\pm$  standard deviation. Differences between two groups were analyzed in GraphPad Prism by two-tailed T-tests if the data were normally distributed, and Mann-Whitney tests if the data were not.  $P < 0.05$  was considered statistically significant. No explicit power analysis was used. Three (SMLM) or five (electrophysiology) mice per genotype were used as biological replicates, providing sufficient statistical power. For SMLM, 47/24 (wild type), 26/27 (*mdx*), and 13/19 ( $\Delta$ SIV) cells were imaged on intracellular and surface imaging planes, respectively, also providing sufficient statistical power. For individual experiments, cells from different genotypes were always isolated, or stained and imaged side by side. We performed 5/4 (wild type), 3/3 (*mdx*), and 2/3 ( $\Delta$ SIV) technical replicates for intracellular and surface imaging, respectively. A technical replicate is defined as one round of staining and imaging. For electrophysiology, currents were recorded in seven control and seven detubulated cells from five wild-type mice. Each mouse counts as one technical replicate as data from each mouse were collected on one experiment day.

## Exclusion and inclusion criteria

Regarding SMLM data, cells with irregular Bin1 staining were excluded, as they indicated a technical problem and/or T-tubular remodeling. All other cells were included as  $\alpha$ -actinin and Na<sub>v</sub>1.5 stainings showed consistent results. No outliers were excluded.

Regarding electrophysiology data, we only included recordings with gigaseal and high-quality voltage clamp. Among those, no outliers were excluded.

---

## ACKNOWLEDGMENTS

---

The authors express their gratitude to Marta Pérez-Hernández Durán, Alejandra Leo-Macias, and Yandong Yin (NYUMC), and to Maria Essers and Sabrina Guichard (University of Bern) for their stellar technical assistance.

HA and SHV acknowledge funding from the Swiss National Science Foundation (grant no. 310030\_165741 [HA] and P1BEP3\_172237 [SHV]).

---

## AUTHOR CONTRIBUTIONS

---

SHV, HA, and JSR contributed conception of the study; SHV, JSR, EAP, ER, and MD contributed methodology; SHV and JSR performed experiments; SHV contributed validation, data curation, project administration, visualization, and writing—original draft; SHV and JSR performed formal analysis and investigation; EAP, ER, MD, and HA contributed resources; JSR, EAP, ER, MD, and HA supervised; SHV and HA contributed funding acquisition; and all authors contributed writing—review & editing.



## ADDITIONAL INFORMATION

**Competing interest:** The authors declare that the research was conducted in the absence of any commercial or financial relationships that could be construed as a potential conflict of interest.

## REFERENCES

- 1 Gellens, M. E., George, A. L., Jr., Chen, L. Q., Chahine, M., Horn, R., Barchi, R. L. & Kallen, R. G. Primary structure and functional expression of the human cardiac tetrodotoxin-insensitive voltage-dependent sodium channel. *Proc Natl Acad Sci U S A* **89**, 554-558, doi:10.1073/pnas.89.2.554 (1992).
- 2 Veerman, C. C., Wilde, A. A. & Lodder, E. M. The cardiac sodium channel gene SCN5A and its gene product Nav1.5: Role in physiology and pathophysiology. *Gene* **573**, 177-187, doi:10.1016/j.gene.2015.08.062 (2015).
- 3 Wilde, A. A. M. & Amin, A. S. Clinical Spectrum of SCN5A Mutations: Long QT Syndrome, Brugada Syndrome, and Cardiomyopathy. *JACC Clin Electrophysiol* **4**, 569-579, doi:10.1016/j.jacep.2018.03.006 (2018).
- 4 Vermij, S. H., Abriel, H. & van Veen, T. A. Refining the molecular organization of the cardiac intercalated disc. *Cardiovasc. Res.* **113**, 259-275, doi:10.1093/cvr/cvw259 (2017).
- 5 Shy, D., Gillet, L., Ogrodnik, J. *et al.* PDZ domain-binding motif regulates cardiomyocyte compartment-specific Nav1.5 channel expression and function. *Circulation* **130**, 147-160, doi:10.1161/circulationaha.113.007852 (2014).
- 6 Vermij, S. H., Abriel, H. & Kucera, J. P. Modelling depolarization delay, sodium currents, and electrical potentials in cardiac transverse tubules. *bioRxiv*, 611558, doi:10.1101/611558 (2019).
- 7 Petitprez, S., Zmoos, A. F., Ogrodnik, J. *et al.* SAP97 and dystrophin macromolecular complexes determine two pools of cardiac sodium channels Nav1.5 in cardiomyocytes. *Circ. Res.* **108**, 294-304, doi:10.1161/CIRCRESAHA.110.228312 (2011).
- 8 Gavillet, B., Rougier, J. S., Domenighetti, A. A. *et al.* Cardiac sodium channel Nav1.5 is regulated by a multiprotein complex composed of syntrophins and dystrophin. *Circ. Res.* **99**, 407-414, doi:10.1161/01.RES.0000237466.13252.5e (2006).
- 9 Eichel, C. A., Beuriot, A., Chevalier, M. Y. *et al.* Lateral Membrane-Specific MAGUK CASK Down-Regulates Nav1.5 Channel in Cardiac Myocytes. *Circ. Res.* **119**, 544-556, doi:10.1161/CIRCRESAHA.116.309254 (2016).
- 10 Guilbeau-Frugier, C., Cauquil, M., Karsenty, C. *et al.* Structural evidence for a new elaborate 3D-organization of the cardiomyocyte lateral membrane in adult mammalian cardiac tissues. *Cardiovasc. Res.* **115**, 1078-1091, doi:10.1093/cvr/cvy256 (2019).
- 11 Rivaud, M. R., Agullo-Pascual, E., Lin, X. *et al.* Sodium Channel Remodeling in Subcellular Microdomains of Murine Failing Cardiomyocytes. *J Am Heart Assoc* **6**, doi:10.1161/JAHA.117.007622 (2017).
- 12 Bhargava, A., Lin, X., Novak, P., Mehta, K., Korchev, Y., Delmar, M. & Gorelik, J. Super-resolution scanning patch clamp reveals clustering of functional ion channels in adult ventricular myocyte. *Circ. Res.* **112**, 1112-1120, doi:10.1161/CIRCRESAHA.111.300445 (2013).
- 13 Hong, T. & Shaw, R. M. Cardiac T-tubule microanatomy and function. *Physiol. Rev.* **97**, 227-252, doi:10.1152/physrev.00037.2015 (2017).
- 14 Bootman, M. D., Higazi, D. R., Coombes, S. & Roderick, H. L. Calcium signalling during excitation-contraction coupling in mammalian atrial myocytes. *J. Cell Sci.* **119**, 3915-3925, doi:10.1242/jcs.03223 (2006).
- 15 Kawai, M., Hussain, M. & Orchard, C. H. Excitation-contraction coupling in rat ventricular myocytes after formamide-induced detubulation. *Am. J. Physiol.* **277**, H603-609, doi:10.1152/ajpheart.1999.277.2.H603 (1999).

- 1 16 Brette, F. & Orchard, C. H. Density and sub-cellular distribution of cardiac and neuronal sodium channel isoforms  
2 in rat ventricular myocytes. *Biochem. Biophys. Res. Commun.* **348**, 1163-1166, doi:10.1016/j.bbrc.2006.07.189  
3 (2006).
- 4 17 Pasek, M., Brette, F., Nelson, A., Pearce, C., Qaiser, A., Christe, G. & Orchard, C. H. Quantification of t-tubule  
5 area and protein distribution in rat cardiac ventricular myocytes. *Prog. Biophys. Mol. Biol.* **96**, 244-257,  
6 doi:10.1016/j.pbiomolbio.2007.07.016 (2008).
- 7 18 Mohler, P. J., Rivolta, I., Napolitano, C., LeMaillet, G., Lambert, S., Priori, S. G. & Bennett, V. Nav1.5 E1053K  
8 mutation causing Brugada syndrome blocks binding to ankyrin-G and expression of Nav1.5 on the surface of  
9 cardiomyocytes. *Proc. Natl. Acad. Sci. USA* **101**, 17533-17538, doi:10.1073/pnas.0403711101 (2004).
- 10 19 Ponce-Balbuena, D., Guerrero-Serna, G., Valdivia, C. R. *et al.* Cardiac Kir2.1 and Nav1.5 channels traffic  
11 together to the sarcolemma to control excitability. *Circ. Res.* **122**, 1501-1516, doi:10.1161/circresaha.117.311872  
12 (2018).
- 13 20 Rougier, J.-S., Essers, M. C., Gillet, L., Guichard, S., Sonntag, S., Shmerling, D. & Abriel, H. A distinct pool of  
14 Nav1.5 channels at the lateral membrane of murine ventricular cardiomyocytes. *bioRxiv*, 572180,  
15 doi:10.1101/572180 (2019).
- 16 21 Lin, X., Liu, N., Lu, J. *et al.* Subcellular heterogeneity of sodium current properties in adult cardiac ventricular  
17 myocytes. *Heart Rhythm* **8**, 1923-1930, doi:10.1016/j.hrthm.2011.07.016 (2011).
- 18 22 Dominguez, J. N., de la Rosa, A., Navarro, F., Franco, D. & Aranega, A. E. Tissue distribution and subcellular  
19 localization of the cardiac sodium channel during mouse heart development. *Cardiovasc. Res.* **78**, 45-52,  
20 doi:10.1093/cvr/cvm118 (2008).
- 21 23 Yin, Y., Lee, W. T. C. & Rothenberg, E. Ultrafast data mining of molecular assemblies in multiplexed high-density  
22 super-resolution images. *Nat Commun* **10**, 119, doi:10.1038/s41467-018-08048-2 (2019).
- 23 24 Fu, Y. & Hong, T. BIN1 regulates dynamic t-tubule membrane. *Biochim. Biophys. Acta* **1863**, 1839-1847,  
24 doi:10.1016/j.bbamcr.2015.11.004 (2016).
- 25 25 Bermudez-Hernandez, K., Keegan, S., Whelan, D. R. *et al.* A Method for Quantifying Molecular Interactions  
26 Using Stochastic Modelling and Super-Resolution Microscopy. *Sci Rep* **7**, 14882, doi:10.1038/s41598-017-14922-  
27 8 (2017).
- 28 26 Hong, T., Yang, H., Zhang, S. S. *et al.* Cardiac BIN1 folds T-tubule membrane, controlling ion flux and limiting  
29 arrhythmia. *Nat. Med.* **20**, 624-632, doi:10.1038/nm.3543 (2014).
- 30 27 Leo-Macias, A., Agullo-Pascual, E., Sanchez-Alonso, J. L. *et al.* Nanoscale visualization of functional  
31 adhesion/excitability nodes at the intercalated disc. *Nat Commun* **7**, 10342, doi:10.1038/ncomms10342 (2016).
- 32 28 Jack, J. J. B., Noble, D. & Tsien, R. W. Nonlinear cable theory: conduction. in *Electric current flow in excitable*  
33 *cells* (ed. J. J. B. Jack, D. Noble, & R. W. Tsien) Ch. 10, 292-296 (Clarendon Press, Oxford, 1975).
- 34 29 Hong, T. T., Smyth, J. W., Gao, D. *et al.* BIN1 localizes the L-type calcium channel to cardiac T-tubules. *PLoS*  
35 *Biol.* **8**, e1000312, doi:10.1371/journal.pbio.1000312 (2010).
- 36 30 Lab, M. J., Bhargava, A., Wright, P. T. & Gorelik, J. The scanning ion conductance microscope for cellular  
37 physiology. *Am. J. Physiol. Heart Circ. Physiol.* **304**, H1-11, doi:10.1152/ajpheart.00499.2012 (2013).
- 38 31 Bonuccelli, G., Sotgia, F., Schubert, W. *et al.* Proteasome inhibitor (MG-132) treatment of mdx mice rescues the  
39 expression and membrane localization of dystrophin and dystrophin-associated proteins. *Am J Pathol* **163**, 1663-  
40 1675, doi:10.1016/S0002-9440(10)63523-7 (2003).
- 41 32 Masubuchi, N., Shidoh, Y., Kondo, S., Takatoh, J. & Hanaoka, K. Subcellular localization of dystrophin isoforms  
42 in cardiomyocytes and phenotypic analysis of dystrophin-deficient mice reveal cardiac myopathy is predominantly  
43 caused by a deficiency in full-length dystrophin. *Exp Anim* **62**, 211-217, doi:10.1538/expanim.62.211 (2013).
- 44 33 Hernandez-Gonzalez, E. O., Mornet, D., Rendon, A. & Martinez-Rojas, D. Absence of Dp71 in mdx3cv mouse  
45 spermatozoa alters flagellar morphology and the distribution of ion channels and nNOS. *J. Cell Sci.* **118**, 137-145,  
46 doi:10.1242/jcs.01584 (2005).
- 47 34 Hatano, A., Okada, J., Washio, T., Hisada, T. & Sugiura, S. An integrated finite element simulation of  
48 cardiomyocyte function based on triphasic theory. *Front. Physiol.* **6**, 287, doi:10.3389/fphys.2015.00287 (2015).

- 1 35 Amann, K. J., Renley, B. A. & Ervasti, J. M. A cluster of basic repeats in the dystrophin rod domain binds F-actin  
2 through an electrostatic interaction. *J. Biol. Chem.* **273**, 28419-28423, doi:10.1074/jbc.273.43.28419 (1998).
- 3 36 Matamoros, M., Perez-Hernandez, M., Guerrero-Serna, G. *et al.* Nav1.5 N-terminal domain binding to alpha1-  
4 syntrophin increases membrane density of human Kir2.1, Kir2.2 and Nav1.5 channels. *Cardiovasc. Res.* **110**, 279-  
5 290, doi:10.1093/cvr/cvw009 (2016).
- 6 37 Albesa, M., Ogrodnik, J., Rougier, J. S. & Abriel, H. Regulation of the cardiac sodium channel Nav1.5 by utrophin  
7 in dystrophin-deficient mice. *Cardiovasc. Res.* **89**, 320-328, doi:10.1093/cvr/cvq326 (2011).
- 8 38 Liao, H. K., Hatanaka, F., Araoka, T. *et al.* In Vivo Target Gene Activation via CRISPR/Cas9-Mediated Trans-  
9 epigenetic Modulation. *Cell* **171**, 1495-1507 e1415, doi:10.1016/j.cell.2017.10.025 (2017).
- 10 39 Garcia-Pelagio, K. P., Bloch, R. J., Ortega, A. & Gonzalez-Serratos, H. Biomechanics of the sarcolemma and  
11 costameres in single skeletal muscle fibers from normal and dystrophin-null mice. *J. Muscle Res. Cell Motil.* **31**,  
12 323-336, doi:10.1007/s10974-011-9238-9 (2011).
- 13 40 Lorin, C., Gueffier, M., Bois, P., Faivre, J. F., Cognard, C. & Sebillé, S. Ultrastructural and functional alterations  
14 of EC coupling elements in mdx cardiomyocytes: an analysis from membrane surface to depth. *Cell Biochem*  
15 *Biophys* **66**, 723-736, doi:10.1007/s12013-013-9517-8 (2013).
- 16 41 Chapman, V. M., Miller, D. R., Armstrong, D. & Caskey, C. T. Recovery of induced mutations for X chromosome-  
17 linked muscular dystrophy in mice. *Proc Natl Acad Sci U S A* **86**, 1292-1296, doi:10.1073/pnas.86.4.1292 (1989).
- 18 42 Huang, F., Hartwich, T. M., Rivera-Molina, F. E. *et al.* Video-rate nanoscopy using sCMOS camera-specific  
19 single-molecule localization algorithms. *Nat. Methods* **10**, 653-658, doi:10.1038/nmeth.2488 (2013).
- 20 43 Huang, F., Schwartz, S. L., Byars, J. M. & Lidke, K. A. Simultaneous multiple-emitter fitting for single molecule  
21 super-resolution imaging. *Biomed Opt Express* **2**, 1377-1393, doi:10.1364/BOE.2.001377 (2011).
- 22 44 Brette, F., Komukai, K. & Orchard, C. H. Validation of formamide as a detubulation agent in isolated rat cardiac  
23 cells. *Am. J. Physiol. Heart Circ. Physiol.* **283**, H1720-1728, doi:10.1152/ajpheart.00347.2002 (2002).

24

25

## SOURCE DATA

**Figure 2d – Source data 1.** This spreadsheet contains the percentages of Na<sub>v</sub>1.5 clusters which edges are 50 nm from the edge of the nearest  $\alpha$ -actinin cluster at the lateral membrane of wild-type cardiomyocytes, and the corresponding statistical analyses. Values from original images are compared to those from simulations in which Na<sub>v</sub>1.5 clusters are redistributed over the respective image either randomly or with high affinity for  $\alpha$ -actinin.

**Figure 3d-f – Source data 2.** This spreadsheet contains data on Na<sub>v</sub>1.5 cell surface expression (pertaining to **Fig 3d**), frequency distribution of edge distances from any  $\alpha$ -actinin cluster to the closest Na<sub>v</sub>1.5 cluster (pertaining to **Fig 3e**), and the percentage of Na<sub>v</sub>1.5 clusters within 50 nm from  $\alpha$ -actinin at the lateral membranes of wild-type, *mdx*, and  $\Delta$ SIV cells. Statistical analyses and descriptive statistics are given where applicable.

**Figure 4d-e – Source data 3.** This spreadsheet contains the values of the frequency distribution of edge distances from any Bin1 cluster to the closest Na<sub>v</sub>1.5 cluster (pertaining to **Fig 4d**), and the percentages of Na<sub>v</sub>1.5 clusters within 50 nm from Bin1 (pertaining to **Fig 4e**) in intracellular recordings of wild-type cardiomyocytes. Statistical analyses and descriptive statistics are also given.

**Figure 5 – Source data 4.** This spreadsheet contains values of cell capacitance, maximum sodium current, and sodium current density recorded in normal and detubulated wild-type cardiomyocytes. Statistical analyses are included.

**Figure 6 – Source data 5.** This spreadsheet contains values of Na<sub>v</sub>1.5 cluster density and frequency distributions of edge distances from any Bin1 cluster to the closest Na<sub>v</sub>1.5 cluster in intracellular planes in wild-type, *mdx*, and  $\Delta$ SIV cells. Statistical analyses and descriptive statistics are included.

**Supplemental figure 2 – Source file 6.** This spreadsheet contains values of cell size, average Na<sub>v</sub>1.5 cluster size, Na<sub>v</sub>1.5 cluster solidity and circularity of wild-type, *mdx*, and  $\Delta$ SIV cardiomyocytes at surface (pertaining to **Supplemental Fig 2a**) and intracellular imaging planes (pertaining to **Supplemental Fig 2b**). Statistical analyses are included.

**Supplemental figure 3 – Source file 7.** This spreadsheet contains values of Na<sub>v</sub>1.5 clusters within 50 nm from  $\alpha$ -actinin at the cell surface (pertaining to **Supplemental Fig 3a**) and Bin1 inside the cell (pertaining to **Supplemental Fig 3b**). Values are compared between original images and simulations in which Na<sub>v</sub>1.5 clusters are redistributed either randomly or with high affinity for  $\alpha$ -actinin or Bin1, respectively. Statistical analyses are also given.

## SUPPLEMENTAL FIGURES

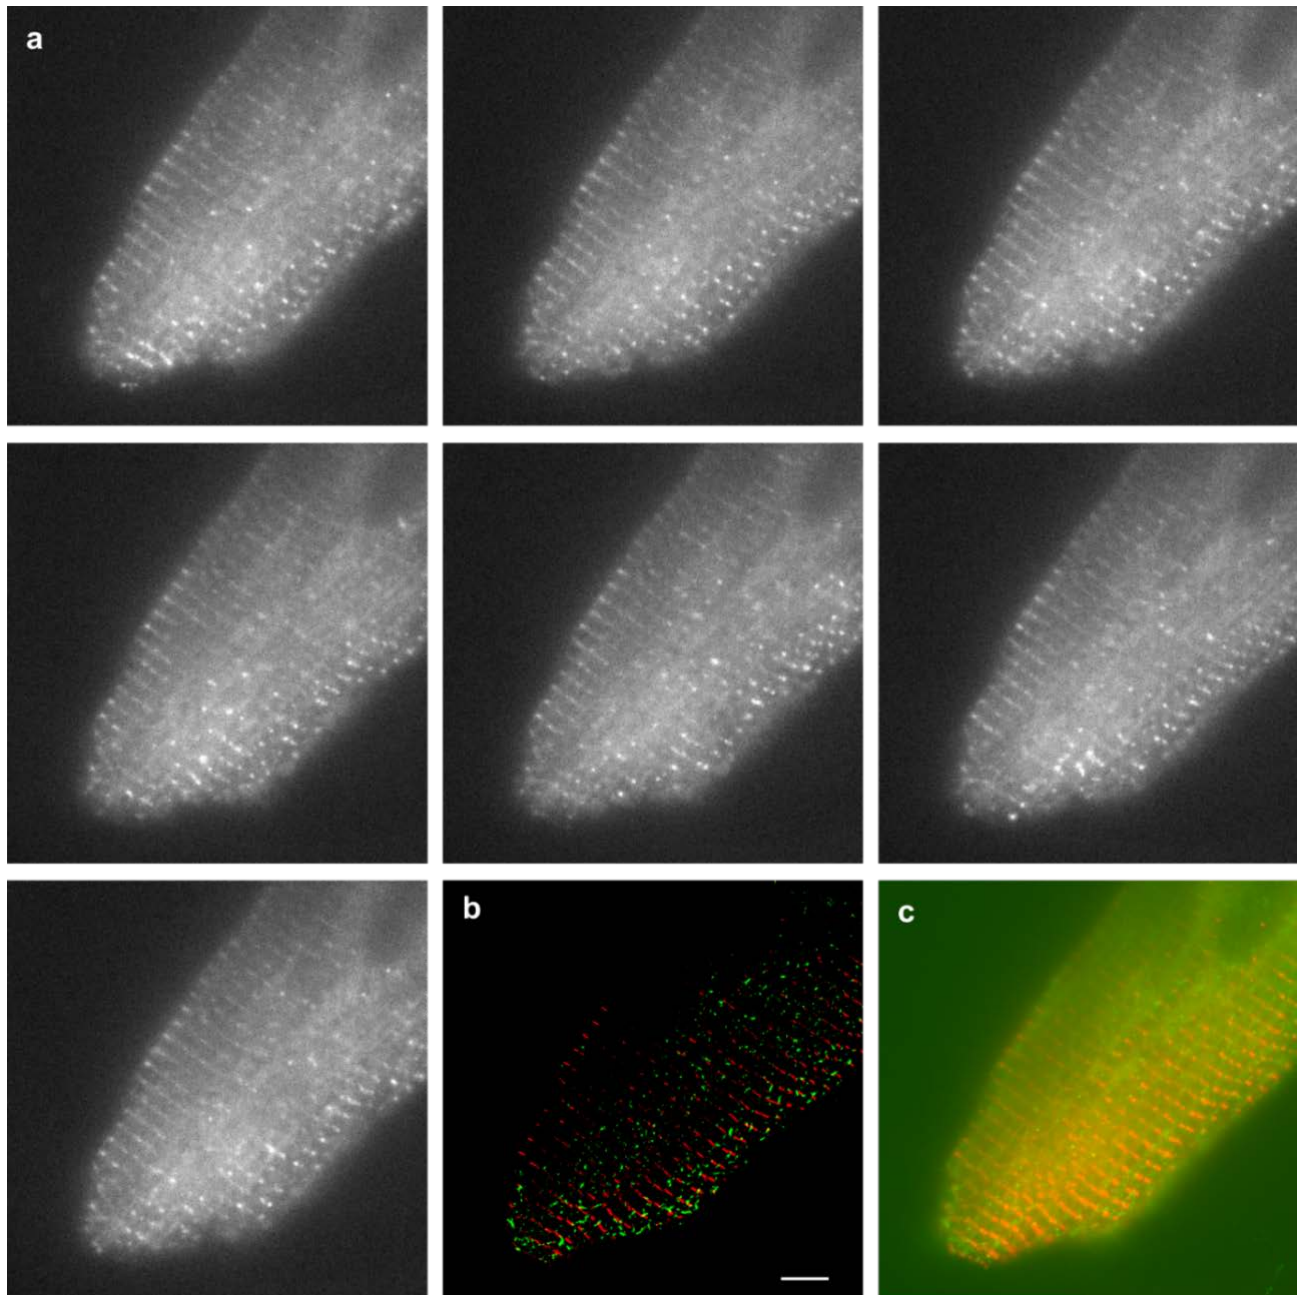

**Supplemental figure 1. Fluorophores blink during SMLM image acquisition.** **a**, Frames from a recording of a cardiomyocyte stained with anti- $\alpha$ -actinin antibodies directly conjugated to AlexaFluor 647 fluorophores and excited with a 639 nm laser. The fluorophores release photons intermittently – “blink” – due to the oxygen scavenging imaging buffer (see Methods). **b**, Reconstructed image depicting  $\alpha$ -actinin in red and Na<sub>v</sub>1.5 in green. Note that the fluorophores on the left side of the cell that did not blink, characterized by a faint striated pattern in all panels of (a), are not reconstructed in the final SMLM image (b). Scale bar 5  $\mu$ m.



## a Surface images

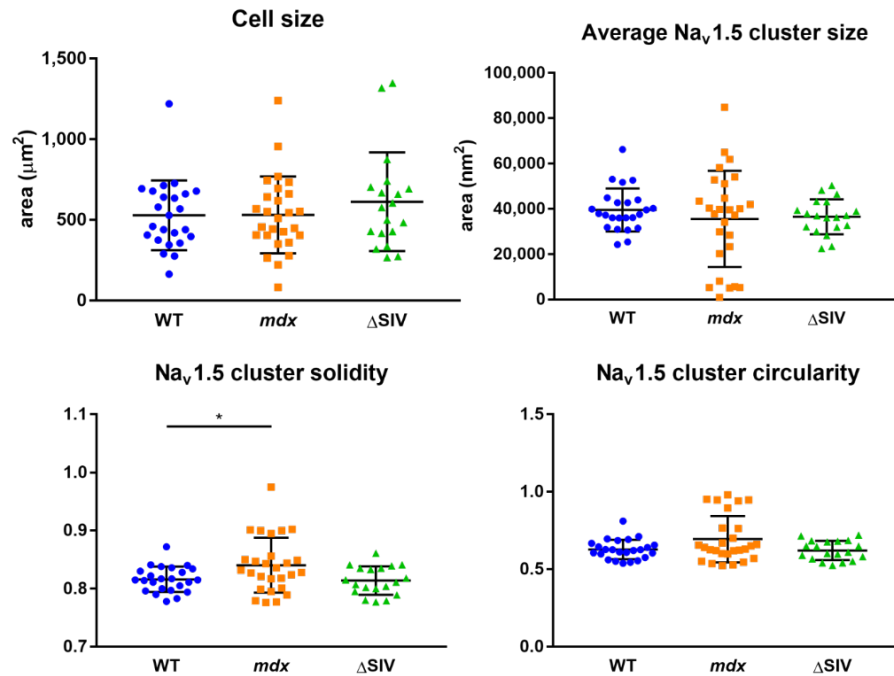

## b Intracellular images

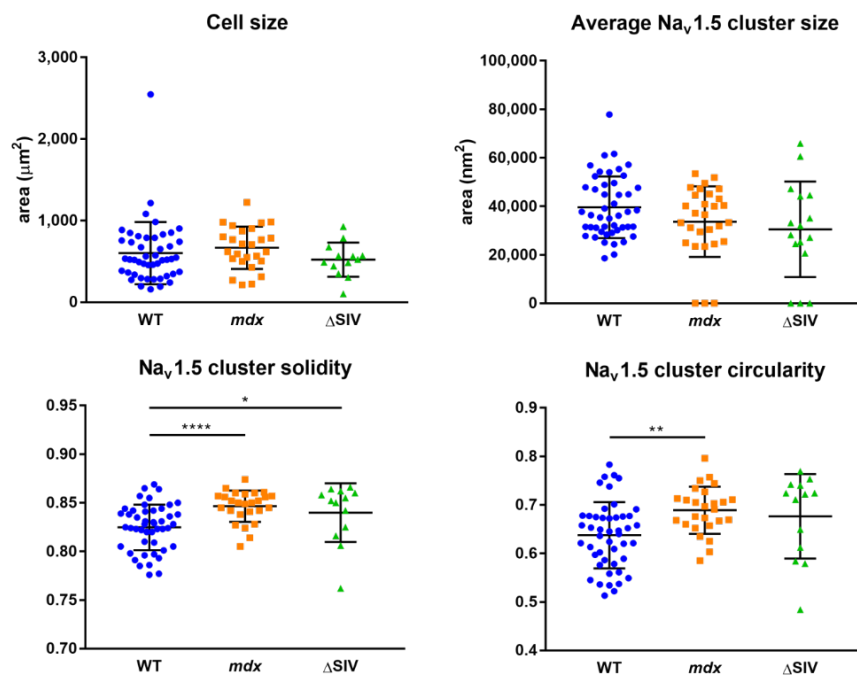

1

2 **Supplemental figure 2. Cell and Na<sub>v</sub>1.5 cluster properties of SMLM images.** For all images from wild-type, *mdx*, and  $\Delta$ SIV cells at the  
3 lateral membrane (a) and inside the cell (b), this figure shows cell size, and cluster size, circularity, and solidity of Na<sub>v</sub>1.5 clusters per  
4 cell. Perfectly circular and solid clusters give value 1. Solidity indicates the ratio of the particle area to the area of the convex hull of the  
5 particle. a, Wild type  $N = 3$ ,  $n = 24$ ; *mdx*  $N = 3$ ,  $n = 27$ ;  $\Delta$ SIV  $N = 3$ ,  $n = 19$ . b, Wild type  $N = 3$ ,  $n = 39$ ; *mdx*  $N = 3$ ,  $n = 20$ ;  $\Delta$ SIV  $N = 3$ ,  $n =$   
6 11. \*,  $p = 0.041$  (a, solidity);  $p = 0.021$  (b, solidity); \*\*,  $p = 0.001$ ; \*\*\*\*,  $p < 0.0001$ , Mann Whitney test.

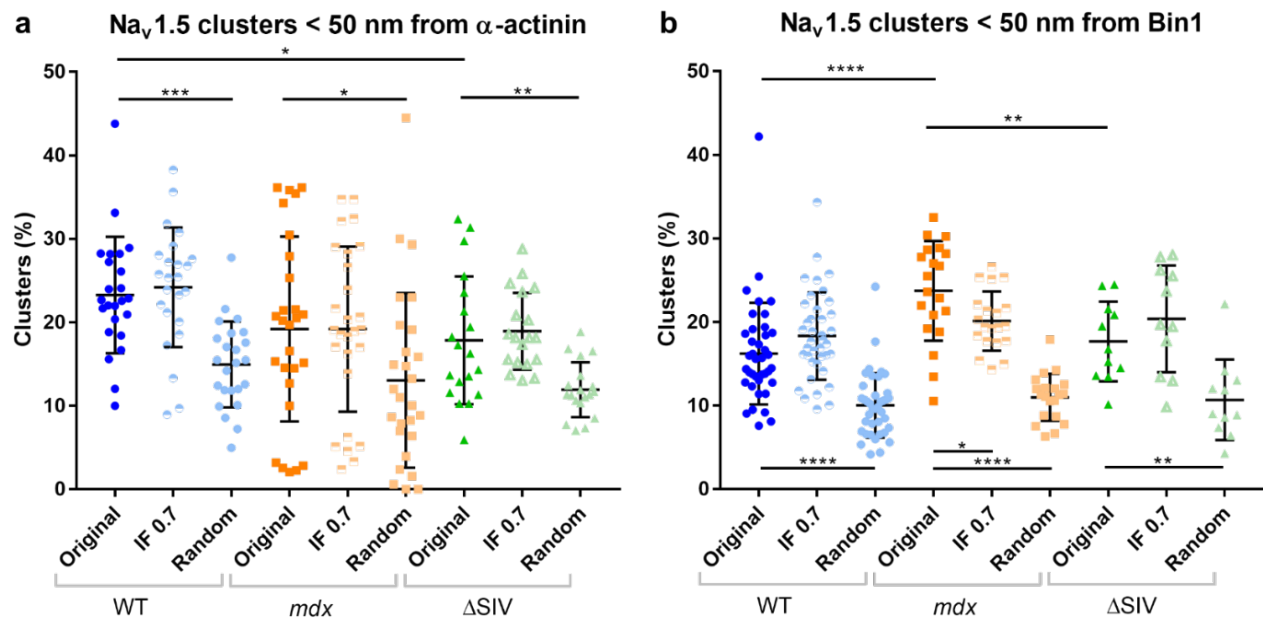

**Supplemental figure 3. Comparing cluster distances of experimental SMLM images to simulations.** Proportion of  $\text{Na}_v1.5$  clusters within 50 nm from  $\alpha$ -actinin at the lateral membrane (a) and Bin1 inside the cell (b). SMLM images from wild-type (blue), *mdx* (orange), and  $\Delta$ SIV (green) cells are compared to their respective high affinity (IF 0.7) and random simulations. **a**, Wild type  $N = 3$ ,  $n = 24$ ; *mdx*  $N = 3$ ,  $n = 27$ ;  $\Delta$ SIV  $N = 3$ ,  $n = 19$ . **b**, Wild type  $N = 3$ ,  $n = 39$ ; *mdx*  $N = 3$ ,  $n = 20$ ;  $\Delta$ SIV  $N = 3$ ,  $n = 11$ . \*,  $p = 0.0194$  (a,  $\Delta$ SIV-WT),  $p = 0.017$  (b, *mdx*); \*\*,  $p = 0.0074$  (a,  $\Delta$ SIV),  $p = 0.0019$  (b,  $\Delta$ SIV),  $p = 0.0095$  (b, *mdx*- $\Delta$ SIV); \*\*\*,  $p < 0.001$ , \*\*\*\*,  $p < 0.0001$ , unpaired T-test (b, wild type) and Mann Whitney test (all others).

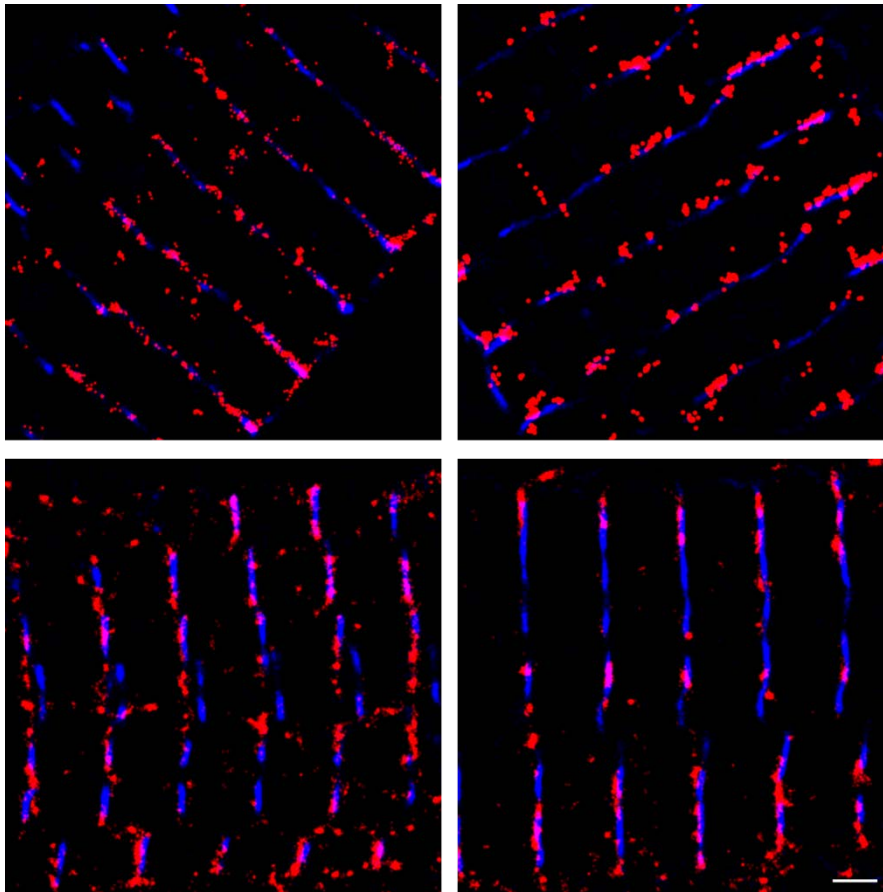

1

2 **Supplemental figure 4. Bin1 antibody validation.** Representative SMLM images of Bin1 (red) and  $\alpha$ -actinin (blue) showing close  
3 proximity of Bin1 to  $\alpha$ -actinin. This indicates that the anti-Bin1 antibody is most likely specific, as Bin1 binds the T-tubular membrane,  
4 and most T-tubules run along  $\alpha$ -actinin lines, which constitute the sarcomeric Z-discs. Bin1 signal in between  $\alpha$ -actinin lines may indicate  
5 axial T-tubular branches.  $N = 3$ ,  $n = 57$ ; scale bar 1  $\mu$ m.
